# Supplementary material
Source: PubMed Central journal article supplement (PMC2665111)
Supplement: M809071200_1.pdf [file M809071200_1.pdf]

## Supporting Information

## Figure Legends for Supporting Information

**Fig. S1.** Multiple amino acid alignments among tissue-type (A) and venom-type (B) VEGFs.

Identical residues with Vaa-VEGF-A<sub>166</sub> (A) and barietin (B) are shaded and conserved cysteine residues are highlighted in black. Putative signal peptides and possessed sequences are shown in *italic-style lowercase*. The numbers at the top refer to residue numbers of Hs-VEGF-A<sub>165</sub> (A) and barietin (B) respectively. The secondary structural elements are shown as arrows for  $\beta$ -strands and cylinders for  $\alpha$ -helices, and loops are labeled. C-terminal putative coreceptor-binding regions are boxed with dotted lines, and the reported heparin-binding sequences are marked with underlines. B, The six residues which are predicted to form a basic cluster in barietin are in bold letters. Note that the sequences of HF and ICPP are shown as mature proteins, because the cDNAs encoding HF and ICPP have not been reported (29,30).

**Fig. S2.** Nucleotide sequences of tissue- and venom-type VEGF genes from *T. flavoviridis*

**A.** Nucleotide sequence of tissue-type VEGF gene from *T. flavoviridis* (*Tf*-VEGF-A). Sequences of exons and introns are shown in bold capitals and lowercase, respectively.

**B.** Nucleotide sequence of venom-type VEGF gene from *T. flavoviridis* (*Tf*-svVEGF). Additive sequences that are only seen in the venom-type VEGF gene are shaded in gray.

**C.** Sequence alignment of introns of genes encoding tissue- and venom-type VEGFs from *Trimeresurus flavoviridis*. Identical nucleotides between tissue- and venom-type genes are shaded in gray.

**Fig. S3.** Sequence alignment of amino acids and nucleotides of tissue- and venom-type VEGFs from *Trimeresurus flavoviridis*

Identical nucleotides between tissue- and venom-type VEGF cDNAs are shaded in gray. The amino acid sequence of tissue-type (*Tf*-VEGF-A) is shown at the top, and that of venom-type (*Tf*-svVEGF) is on the bottom. Each exon is divided with a vertical bar, and numbered with Roman numerals. -, gap.

**Fig. S4.** Characterization of barietin, novel venom-type VEGF from the venom of *Bitis arietans*

**A,** Purification of barietin, novel venom-type VEGF from the venom of *Bitis arietans*. Barietin was purified by using three steps of chromatography: Superdex 200-pg gel-filtration, Q Sepharose High Performance, and Hi-Trap Heparin FPLC columns. Figure S4A shows a chromatogram of heparin affinity chromatography, the final step of purification. The fractions containing barietin were determined by anti-vammin antiserum reactivity (●), indicated with a bar on the top. SDS-PAGE (10% acrylamide) of purified barietin, with or without reducing agent, is indicated by R or NR.

**B,** Amino acid sequence deduced from the nucleotide sequence encoding barietin. Putative signal peptide and propeptide are indicated in lowercase italics. The numbers at the top refer to residue numbers of purified barietin. The determined internal amino acid residues by amino acid analysis are indicated with lines and arrows. K: endoprotease Lys-C; D: endoprotease Asp-N.

**C, D,** The molecular masses of purified barietin (C) and peptide-K2 (D) as analyzed by MALDI-TOF MS (average  $\pm$  SD,  $n=3$ ).

**Fig. S5.** Multiple alignment of cDNA sequences encoding venom-type VEGFs

Conserved nucleotides among cDNAs are shaded in light (UTR) and dark gray (ORF), and the initial-codon (ATG) and stop-codon (TGA) are highlighted in black. The number on the left indicates nucleotides starting at the initial-codon. Each exon is divided with a vertical bar, and numbered with Roman numerals (I to VI). The nucleotide sequence of the 3'-UTR of *Tf*-svVEGF cDNA (10) was determined in this

study. The complete sequences of 5'- and 3'-UTRs of Pm-VEGF cDNA have been not reported (11). -; gap. Gaps in the C-terminal tail-coding region are highlighted in yellow.

## A Tissue-type

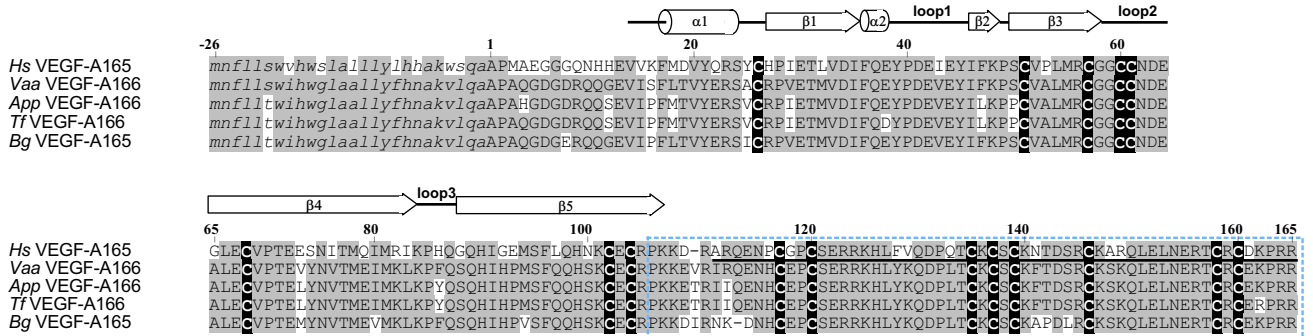

## B Venom-type

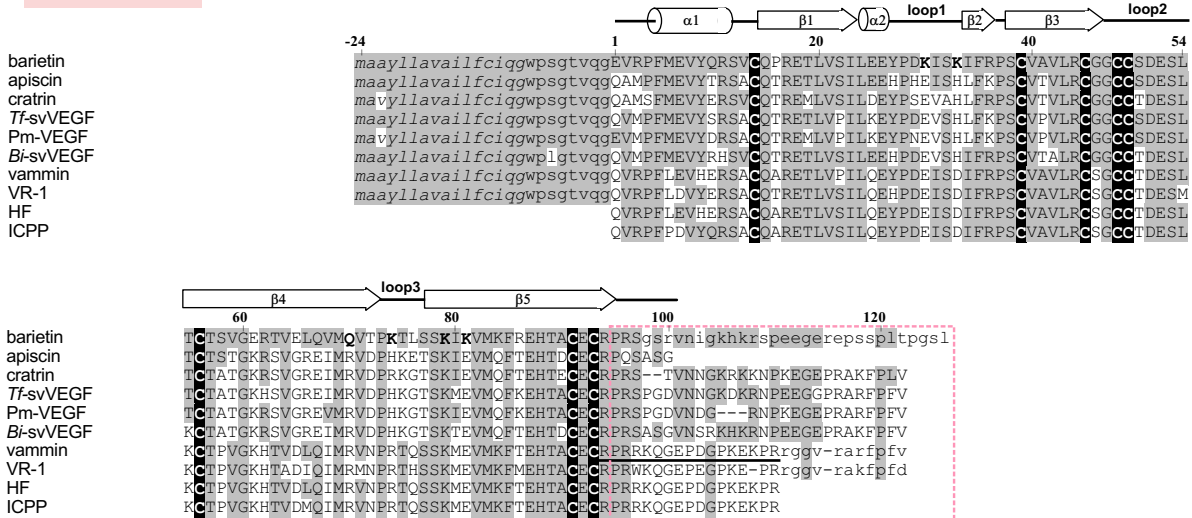

Fig. S1.







(bp) (aa)

1 **GGGAATGGACTGCCAGGCCCTGCCATGCTTCTGGGATTTGCCACTCTGTGCCTGCCTGTT**  
**GTCACCGGCTTCTGCCTCTCTCTTGTCTTGTAAATCTCACCACCACCACCACCACCC**  
**AGTCTGAAATTTGCCAGCTCAGATCTCACCACATCTCCTTCTTCTGAGCAGCTGTGAAG**  
**CCAGGAGGAGATAGGCCATGGCTGCGTACCTGCTGGCAGTTGCCATCCTCTTCTGCATCC**  
**m a a y l l a v a i l f c i**  
**AG**gtgaaactctggggtccctgggggatcttgctgggatcaactcctcacaggg  
**q** -10  
aattttcagccaaataaggggggaaaaacagattaaatctgttatttagtcagggtaaag  
aataaaagtgacttctaaggttgagaattcacgacctctgctgcagatgagaattaaa  
ttacctctgtaggtggtggcagcctctccactaacacacgtggccacccccaccggcttg  
cctggcaggatgatgcacagagcagctgggtgcttctggggagaagagcgacctgctctc  
tgccccctgcaggagaccagggcaggtgcccgctgcatctccctctagtgggtcactcagt  
601 agcataagaactcttctgatttcaaaagttagcccttgcatctgtgacctggggcaggagc  
cgcccaggacaaggcaactggggcaggggttaaaacattccacaccagcagttttcaagt  
tggccactttgggatgtgtgacttccactccaggctgactggggaattctgggaaattga  
agtccacattaaagtggctaaatttgaaaaactgacctgtcaccagatggaggact  
agaaccgtgctcgggtgcagatgcattcttcttggcaactcctgggttccctgtctt  
tctcgcactctgtgatgctcccgggtgccagattcagggtggaccttctgtaactggg  
cctttctctcttgcag**GGCTGGCCATCAGGGACAGTGCAGGGACAAG**gcaagttccctt  
**g w p s g t v q g Q** 1  
tctaagatcttatctggtaaatgggggtggtgctccagagcactcgtcttgccttgaaaa  
gagccgggggcagaaaaaggggacccccacctctgcttgcgccccagggcagaaacctctgg  
gtgagatccctggcagacacacgacctgccacctgcacgctcagagcagatgggaaacagg  
201 ctcctctgggagggcacaaggttgacgggttgacgacgcagcgtttccccaggggtgag  
gggcctggaggggagacatagcccggtggagaagaggggactaccggccccccacc  
tgtctttcccccaaccagggaaaggaaggctgccttggcttaaggcaagaggagctctg  
aaggccagggcagcgtctgactctttctccctcctcag**TGATGCCCTTTATGGAAGT**  
**V M P F M E V**  
**GTACAGCCGACGCGCTGCCAGACCAGGGAGACACTAGTGCCCATCCTCAAAGAGTACCC**  
**Y S R S A C Q T R E T L V P I L K E Y P**  
**CGATGAAGTTTCCACCTCTCAAGCCCTCTGTGTCCTGTGTTGCGATGCGGTGGCTG**  
**D E V S H L F K P S C V P V L R C G G C**  
**CTGCAGCGACGAAAGCCTCACGTGCACCGCTACGGGAAAGCACAGTCCGGTCGGGAG**  
**C S D E S L T C T A T G K H S V G R E** 67  
caggggctgttctgtgctgaggtgacgggctgggggtgggggtgctcaggatagctcttgggg  
gccaggaagagcagagcccagccttgactgctcctgggggtgcaactgaacggtggctgt  
ctctccccctgggtgag**ATCATGCGGGTGGATCCCCAAGGGGACTTCGAAGATGGAGGT**  
**I M R V D P H K G T S K M E V**  
2801 **GATGCAATTCAAGGAGCACAGCCTGTGAATGCAG**gtgaggaagggggccgaacagcgg  
**M Q F K E H T A C E C R** 94  
ctgtcctgggtggctggctcagaggggtgggggaaatgggggagaattgctggaggtggaag  
atgacaagcagttcttagttcacacaacctccctccctccctgctttcttctgcttgcctt  
gctttctcccaccttttattatttttacaataactcaaggtggcgaagatattctcctc  
ctattttccccaccacaacacctgtgagggcaggtttggctgagagagagggaccagcc  
caaacgtcacccccgctcattttccacactgggggttctgcaggggtctctgagcaggagga  
cagaggtgggggctccagacctgtgcaggcaccctcctcagaggccaggttctctgcctc  
actcctctcctggagccccagcggcgggcgaagctcctgagcctgctggctatgcaagac  
tgaactgggttatttctctttccag**GCCTCGATCACCAGGGGATGTGAACAACGGGAA**  
**P R S P G D V N N G K**  
**GGACAAGAG**gtacatggggggaggggctgggggttaacagaataagagaggtgtaagggga  
**D K R** 108  
2401 ccttggaggtcttctagttccaaccctggctcaggttgccctggggcaggctgggagggc  
ggggcaggggcaagatggctgcttgaggcgaactcctcttctccccctttgagc**G**  
**AACCCAGAGGAAGGGGGCCGAGAGCCAGGTTCCCTTTGCTCTGACCAGCTTTTGACTCC**  
**N P E E G G P R A R F P F V \*** 122  
**AGAGCCCTTTGAGGCTTCACAGCCACCAAGGTGGGAGGCTCTGGTCTGCAAAGCCAGC**  
**TGGGACGGCCCTGGGTCCCTGTCTCCTCTTTCTGATGCTGGGGTGGGTGGGAAAGGG**  
**AGGCATCTCCAACATCTGGAGAAGTTGCTATGTATCCATCTACACTTCTATGACAGCCGG**  
**GCCTGGCCTGGCCTCTTCCATGTGTGTGACCTGCAAAACACATCACTCCAGGCTGCAA**  
**GGCCAGAACTGAAGAGCGAAGGCAGCTTCTTCTCCAGTAACCTCAGCAATCAGATTTGGA**  
**TTTCTGGCATCCGAAAGCCTCTTTGACCAGCTAACTCATCTCCCTCAAGAGTTTGCCATT**  
**TTGTGTGACCTTAATGGCTTTTAGTAAAATTTGCTTTGTAATACACAATTTTAAAAT**  
3001 **AAGATTGATATCTCCGACCCCTCATCAGGGGAGCTGGGGAAAAACAGTTTCTTTTAA**  
**GAATGTGGAATTATGTCTTTAGCCCCGTCTGGATCTGCATGACTTTCACAGACCTTGG**  
**AATAACCGAGTAACT** (3,137 bp)

Exon I  
Exon II  
Exon III  
Exon IV  
Exon V  
Exon VI

Fig. S2B. Venom-type VEGF (*Tf*-svVEGF) gene

Intron 1 Tissue- vs venom-type genes

|                       |                                                                                                                                                                                                                                                                                                                                                                                                                                                                                                                                                                                                                                                                                                                                                                                                                                                                                                                                                                                                                                                                                                                                                                                                                                                                                                                                                                                                                                                                                                                                                                                                                                                                                                                                                                                                                                                   |
|-----------------------|---------------------------------------------------------------------------------------------------------------------------------------------------------------------------------------------------------------------------------------------------------------------------------------------------------------------------------------------------------------------------------------------------------------------------------------------------------------------------------------------------------------------------------------------------------------------------------------------------------------------------------------------------------------------------------------------------------------------------------------------------------------------------------------------------------------------------------------------------------------------------------------------------------------------------------------------------------------------------------------------------------------------------------------------------------------------------------------------------------------------------------------------------------------------------------------------------------------------------------------------------------------------------------------------------------------------------------------------------------------------------------------------------------------------------------------------------------------------------------------------------------------------------------------------------------------------------------------------------------------------------------------------------------------------------------------------------------------------------------------------------------------------------------------------------------------------------------------------------|
| (bp)                  |                                                                                                                                                                                                                                                                                                                                                                                                                                                                                                                                                                                                                                                                                                                                                                                                                                                                                                                                                                                                                                                                                                                                                                                                                                                                                                                                                                                                                                                                                                                                                                                                                                                                                                                                                                                                                                                   |
| tissue-type 171       | gtaaagggggcgggcgggcgaggatctggggcgggcgggaagcctctctctcctcctcctcctctcctcctcctcgcgctggcctgttcgccccgcatgttacgctgaacgctcgtgacgagcgcgaggtgatagcggggggggccccaaaagggagcccacacacacgctcggtgagcggatccggaggcgcgacagagaccctccggtcgggttgcctcgcgctcagcccgggggcttgggtgacacctgtgagggcagcggtaacctcggctcggcgctctcggggctcgcgacaaaagaccggccggccgacccttttgagccgagcgagcgcgagcgaagcctcgttataatggcgtttaagctgactggcctgcccgcgtggggcctcgcgctcgcgacgcagggctggggaaaggaaaaaaaagagtagaagatcagaagctggttgcccaccctggcaggtctggcttccctccttgcctgttgccttaggttaagagaccggtcccgagtaggtttccttctctcctcctgtcggggagctgggttagttggaaacctggttttgaaaggacgcctacggaggagcagctctctcgcgctcgtcactgatcggagcatataggctgacttcttgcacacgcggcgggcgggcagcagcagcgcgctctctcctcctcccctgctcctcctgacattgcaaaagcggtgtttttggcttggttgcttagttaggtaggcaggttactgaccgaggttcaaaatctctggcttgcaaaagcaaacagagatcaaaagaccgcaaaatgaattcctgtgcttctccagattgatttacagatggaaagcaccctgctgagtctccataaaataagagctcctcctatacgggtttcccccgctctctaaactcctcctccttattcggttccctattataaaaagtagcggcaaaaggcattaccggaagaccctcagcaggagcctttagcttgctcctaaagggaatcaaaatagttggtggttgcgcgcttgccttagctcctggttaggttagttgattcacaagaaaggggagtgccgggttaattttccatggtgggttggcctttggaatataaggagagaaagtggaagtcttaaaccctcctcaaaatgcaggcagtgctgccccttgccactttcatabgcttggacaataatcttgctcatctatagccccatagctcacttggtggcatcaaggttaaacgagaggtgtaaaaaagttataaactttttttccagccgtagatgtaagatatctgcccatttcagggttgctcgtgttagatggtcaaacggttccaaagctaaatttggttcaagctccagctttgctggaagtgacagcagcacatctgtacaggaagcaggggtgtttttgaggaaaactggtggaacaggttaatctgagatggccatgcttgctttttaaagatgacccaggttatagcgggtttaccaagcctactcagcctgggtttacagatctctcctaaacaatcctggcagtgataggaggtttccaccagcagcttcagatgtcactagatcaagaaatctgatcctgcatgaagtctggtgagacaagtaaaacagaaataaaaaatacagagagggagaatagatggaatgatcagaatatagatgacttccccccccccc caaataagtagagagaggtcctcaactcttatgccccaccatcatttgggtaaatgcttaggt |
| 821                   | gocgctattataatattatattaccaaaggccaaggcagatacagtataatgaaatgaaatctctg --- <b>gtgagaaactctgggggttcctgggtggggatcttgccctgggatcaactcctcacaggcaatt</b>                                                                                                                                                                                                                                                                                                                                                                                                                                                                                                                                                                                                                                                                                                                                                                                                                                                                                                                                                                                                                                                                                                                                                                                                                                                                                                                                                                                                                                                                                                                                                                                                                                                                                                    |
| tissue-type 1991      | gggagcccaaaatgaatgcatcttgcactttttgac-cctagtaagt-tttgaaaacagcttaaact                                                                                                                                                                                                                                                                                                                                                                                                                                                                                                                                                                                                                                                                                                                                                                                                                                                                                                                                                                                                                                                                                                                                                                                                                                                                                                                                                                                                                                                                                                                                                                                                                                                                                                                                                                               |
| <b>venom-type 243</b> | <b>ttcagccaaaataaggggggaaaaacagattaaactctgttatttagtcagggtaagcaataaaagt</b>                                                                                                                                                                                                                                                                                                                                                                                                                                                                                                                                                                                                                                                                                                                                                                                                                                                                                                                                                                                                                                                                                                                                                                                                                                                                                                                                                                                                                                                                                                                                                                                                                                                                                                                                                                        |
| tissue-type 2056      | atattgaaacatgg--aaggaaaaaaactggttggaagaagagaattaaggtatc-ctgtgcgg                                                                                                                                                                                                                                                                                                                                                                                                                                                                                                                                                                                                                                                                                                                                                                                                                                                                                                                                                                                                                                                                                                                                                                                                                                                                                                                                                                                                                                                                                                                                                                                                                                                                                                                                                                                  |
| <b>venom-type 305</b> | <b>gacttctaaggttggaagaaatcacgaccctcctgctgacagatgagaattaaattacctctgtaggt</b>                                                                                                                                                                                                                                                                                                                                                                                                                                                                                                                                                                                                                                                                                                                                                                                                                                                                                                                                                                                                                                                                                                                                                                                                                                                                                                                                                                                                                                                                                                                                                                                                                                                                                                                                                                       |
| tissue-type 2119      | tgtagtgcacaagcgttccaagctaatgttggttcaagctccagctttgctggaagtgacagcagc                                                                                                                                                                                                                                                                                                                                                                                                                                                                                                                                                                                                                                                                                                                                                                                                                                                                                                                                                                                                                                                                                                                                                                                                                                                                                                                                                                                                                                                                                                                                                                                                                                                                                                                                                                                |
| <b>venom-type 370</b> | <b>gacttctaaggttggaagaaatcacgaccctcctgctgacagatgagaattaaattacctctgtaggt</b>                                                                                                                                                                                                                                                                                                                                                                                                                                                                                                                                                                                                                                                                                                                                                                                                                                                                                                                                                                                                                                                                                                                                                                                                                                                                                                                                                                                                                                                                                                                                                                                                                                                                                                                                                                       |
| tissue-type 2181      | tgtagtgcacaagcgttccaagctaatgttggttcaagctccagctttgctggaagtgacagcagc                                                                                                                                                                                                                                                                                                                                                                                                                                                                                                                                                                                                                                                                                                                                                                                                                                                                                                                                                                                                                                                                                                                                                                                                                                                                                                                                                                                                                                                                                                                                                                                                                                                                                                                                                                                |
| <b>venom-type 435</b> | <b>ggtagcagcctctccactaacacacgctggccaccaccgcttgccctggcaggtgatgcaca</b>                                                                                                                                                                                                                                                                                                                                                                                                                                                                                                                                                                                                                                                                                                                                                                                                                                                                                                                                                                                                                                                                                                                                                                                                                                                                                                                                                                                                                                                                                                                                                                                                                                                                                                                                                                             |
| tissue-type 2237      | -agcattaatgtaagttattagggaccactaatct-ctat-taatataaatgcaactgatttc                                                                                                                                                                                                                                                                                                                                                                                                                                                                                                                                                                                                                                                                                                                                                                                                                                                                                                                                                                                                                                                                                                                                                                                                                                                                                                                                                                                                                                                                                                                                                                                                                                                                                                                                                                                   |
| <b>venom-type 500</b> | <b>gagcagctgggtgcttctgggagaaagagcgacctgctcctgccccctgcaggagaccaggca</b>                                                                                                                                                                                                                                                                                                                                                                                                                                                                                                                                                                                                                                                                                                                                                                                                                                                                                                                                                                                                                                                                                                                                                                                                                                                                                                                                                                                                                                                                                                                                                                                                                                                                                                                                                                            |
| tissue-type 2299      | atagctttaatgctttttattaaattataaggtaatggtattaggagctgattgTTTTATTTATT                                                                                                                                                                                                                                                                                                                                                                                                                                                                                                                                                                                                                                                                                                                                                                                                                                                                                                                                                                                                                                                                                                                                                                                                                                                                                                                                                                                                                                                                                                                                                                                                                                                                                                                                                                                 |
| <b>venom-type 565</b> | <b>ggtgccccgctgcatcctcctctagtgggtcagtagca-tagaagcttcttgattt-caaaag</b>                                                                                                                                                                                                                                                                                                                                                                                                                                                                                                                                                                                                                                                                                                                                                                                                                                                                                                                                                                                                                                                                                                                                                                                                                                                                                                                                                                                                                                                                                                                                                                                                                                                                                                                                                                            |
| tissue-type 2364      | ttactgctTTTTGGATTGCTTTTCACTGCCAGAGTTGCTTTTGGTGAATGGGCAGCTATATA                                                                                                                                                                                                                                                                                                                                                                                                                                                                                                                                                                                                                                                                                                                                                                                                                                                                                                                                                                                                                                                                                                                                                                                                                                                                                                                                                                                                                                                                                                                                                                                                                                                                                                                                                                                    |
| <b>venom-type 628</b> | <b>TTA--GC--CCTTGcattg-tgaccactgggc--aggagcgcggaggaca-aggcaactgggcg</b>                                                                                                                                                                                                                                                                                                                                                                                                                                                                                                                                                                                                                                                                                                                                                                                                                                                                                                                                                                                                                                                                                                                                                                                                                                                                                                                                                                                                                                                                                                                                                                                                                                                                                                                                                                           |
| tissue-type 2429      | aagttgataaataaaaaatatatccagcctt--gacttggtgaataaagtcaggttaacttg                                                                                                                                                                                                                                                                                                                                                                                                                                                                                                                                                                                                                                                                                                                                                                                                                                                                                                                                                                                                                                                                                                                                                                                                                                                                                                                                                                                                                                                                                                                                                                                                                                                                                                                                                                                    |
| <b>venom-type 685</b> | <b>agggt--taaa-acattccaccaccagcagttttcaagttggccactttgggatggtggacttc</b>                                                                                                                                                                                                                                                                                                                                                                                                                                                                                                                                                                                                                                                                                                                                                                                                                                                                                                                                                                                                                                                                                                                                                                                                                                                                                                                                                                                                                                                                                                                                                                                                                                                                                                                                                                           |
| tissue-type 2492      | TTTTATA-tat-tatgtgaagttttaaccatgggttgacacaccatagtggtggattcaaaaa                                                                                                                                                                                                                                                                                                                                                                                                                                                                                                                                                                                                                                                                                                                                                                                                                                                                                                                                                                                                                                                                                                                                                                                                                                                                                                                                                                                                                                                                                                                                                                                                                                                                                                                                                                                   |
| <b>venom-type 747</b> | <b>cactccaggctgactggggaattcgggaattgaaagtccacattaaagtggctaaatttgaaaa</b>                                                                                                                                                                                                                                                                                                                                                                                                                                                                                                                                                                                                                                                                                                                                                                                                                                                                                                                                                                                                                                                                                                                                                                                                                                                                                                                                                                                                                                                                                                                                                                                                                                                                                                                                                                           |
| tissue-type 2555      | agcaatcgggtcaaaagccagacaagtcacagtatagcttaagtgaagttgtgagctcataactcag                                                                                                                                                                                                                                                                                                                                                                                                                                                                                                                                                                                                                                                                                                                                                                                                                                                                                                                                                                                                                                                                                                                                                                                                                                                                                                                                                                                                                                                                                                                                                                                                                                                                                                                                                                               |
| <b>venom-type 812</b> | <b>cactgaccctgtcaccag--atgggagtagaaccctggctcgggtg-cagatgcatctctgt</b>                                                                                                                                                                                                                                                                                                                                                                                                                                                                                                                                                                                                                                                                                                                                                                                                                                                                                                                                                                                                                                                                                                                                                                                                                                                                                                                                                                                                                                                                                                                                                                                                                                                                                                                                                                             |
| tissue-type 2620      | gtgatggaatgcag--cattgatttctccttaacagttcctcctggtggctgataaat-ggt                                                                                                                                                                                                                                                                                                                                                                                                                                                                                                                                                                                                                                                                                                                                                                                                                                                                                                                                                                                                                                                                                                                                                                                                                                                                                                                                                                                                                                                                                                                                                                                                                                                                                                                                                                                    |
| <b>venom-type 874</b> | <b>ctttggcacttctcctggttccttgccttctcctgcatctgtgatgctcccgggtgccagattcagg</b>                                                                                                                                                                                                                                                                                                                                                                                                                                                                                                                                                                                                                                                                                                                                                                                                                                                                                                                                                                                                                                                                                                                                                                                                                                                                                                                                                                                                                                                                                                                                                                                                                                                                                                                                                                        |
| tissue-type 2681      | gcagtgccccccccccagtgactaatcacttttgaaggtgtacccttgagtgaaagcagctg                                                                                                                                                                                                                                                                                                                                                                                                                                                                                                                                                                                                                                                                                                                                                                                                                                                                                                                                                                                                                                                                                                                                                                                                                                                                                                                                                                                                                                                                                                                                                                                                                                                                                                                                                                                    |
| <b>venom-type 939</b> | <b>gtggaccctttgctaactgggcttctctctcttgacg------</b>                                                                                                                                                                                                                                                                                                                                                                                                                                                                                                                                                                                                                                                                                                                                                                                                                                                                                                                                                                                                                                                                                                                                                                                                                                                                                                                                                                                                                                                                                                                                                                                                                                                                                                                                                                                                |
| tissue-type 2746      | ttattggtgagaagaccaatggatgaaaagactgaagatccaatccaaaaactgctgcctttag                                                                                                                                                                                                                                                                                                                                                                                                                                                                                                                                                                                                                                                                                                                                                                                                                                                                                                                                                                                                                                                                                                                                                                                                                                                                                                                                                                                                                                                                                                                                                                                                                                                                                                                                                                                  |
|                       | ttttgtacatggcaatacttagtcccctgatgtaatccttttgatgataccggtactaaagttgt                                                                                                                                                                                                                                                                                                                                                                                                                                                                                                                                                                                                                                                                                                                                                                                                                                                                                                                                                                                                                                                                                                                                                                                                                                                                                                                                                                                                                                                                                                                                                                                                                                                                                                                                                                                 |
|                       | tgcagtgagcaagtcctggggctcccctcaagacatcttctgataggacctgagccaaagatc                                                                                                                                                                                                                                                                                                                                                                                                                                                                                                                                                                                                                                                                                                                                                                                                                                                                                                                                                                                                                                                                                                                                                                                                                                                                                                                                                                                                                                                                                                                                                                                                                                                                                                                                                                                   |
|                       | aaacagtaaagggtggaaacacgagcgtgtgaccagactgctaagatgctcacagccactcata                                                                                                                                                                                                                                                                                                                                                                                                                                                                                                                                                                                                                                                                                                                                                                                                                                                                                                                                                                                                                                                                                                                                                                                                                                                                                                                                                                                                                                                                                                                                                                                                                                                                                                                                                                                  |
|                       | cagccttttgctcaggccacactggggctcctgcttacggcccagctgctctcttgaggggag                                                                                                                                                                                                                                                                                                                                                                                                                                                                                                                                                                                                                                                                                                                                                                                                                                                                                                                                                                                                                                                                                                                                                                                                                                                                                                                                                                                                                                                                                                                                                                                                                                                                                                                                                                                   |

Fig. S2C.



**Intron 1** Tissue- vs venom-type genes (*continued*)

| tissue-type | (bp) |                                                                                                                                                                                                                                                                                                                                                                                                                                                                                                                                                                                                                                                                                                                                                                                                                                                                                                                                                                                                                                                                                                                                                                                                                                                                                                                                                                                                                                                                                                                                                                                                                                                                                                                                                                                                                                                                                                                                                                                                                                                                                                                                                                                                                                                                                                                                                                                                                                                                                                                                                                                                                                                                                                               |
|-------------|------|---------------------------------------------------------------------------------------------------------------------------------------------------------------------------------------------------------------------------------------------------------------------------------------------------------------------------------------------------------------------------------------------------------------------------------------------------------------------------------------------------------------------------------------------------------------------------------------------------------------------------------------------------------------------------------------------------------------------------------------------------------------------------------------------------------------------------------------------------------------------------------------------------------------------------------------------------------------------------------------------------------------------------------------------------------------------------------------------------------------------------------------------------------------------------------------------------------------------------------------------------------------------------------------------------------------------------------------------------------------------------------------------------------------------------------------------------------------------------------------------------------------------------------------------------------------------------------------------------------------------------------------------------------------------------------------------------------------------------------------------------------------------------------------------------------------------------------------------------------------------------------------------------------------------------------------------------------------------------------------------------------------------------------------------------------------------------------------------------------------------------------------------------------------------------------------------------------------------------------------------------------------------------------------------------------------------------------------------------------------------------------------------------------------------------------------------------------------------------------------------------------------------------------------------------------------------------------------------------------------------------------------------------------------------------------------------------------------|
| 3071        |      | cagtgggtcaccttcctccttttagctatgcagctgaagggtgaaatcttcttcccgatatacaag<br>tggatggtgcagccctcttcgagatgtatcctagtcattttctgaactcgttttctctctcctttg<br>tgccatgtcagaaatccctcccttattggggccattgcgctttcttctccttagagtgcatagca<br>gggggaggaggagaggagaactgcagcatttaggcagaaaaaattagaggagggttttctctcc<br>ccccccccccagcacctaggatggcatgggtttttaactctagtccaggggcccctcccaaag<br>tggctggattggttgctccagtcocaaaacagttacaaaagctctttaaagaggctgctgagatta<br>aggggagggggaggagaagctagagaaagaatgggtttgatgtgaaagaataggaagtatgtgt<br>gtttgtgtgtgtatgcgtgtgtgtgtgtagaagcaatgtaccaggttaaccttttacttgctt<br>catataggaatgagtaggataaagaatagaattgccagctccctgccaacttgcctgtgtgctcaa<br>gcctaaaagagataattctcctactgtctgtgctgctgaaaaactcctaccaggagacaattaa<br>tgtcttaatggggaaacaatgagtaaaacctcaggccagggaaaaagagatgggtacaagcaatg                                                                                                                                                                                                                                                                                                                                                                                                                                                                                                                                                                                                                                                                                                                                                                                                                                                                                                                                                                                                                                                                                                                                                                                                                                                                                                                                                                                                                                                                                                                                                                                                                                                                                                                                                                                                                                                                                                                              |
| 3786        |      | tgacctcaaacgggacctgtcccttgagaagaaaagttgttttgccttctcttgatgggaa<br>cagggaaacatttagaccttcatctaagccctgatacttgggttaacggagtgccagagaaaaat<br>gtaattcatcagcatgggagcagagaagaaccttcagatttctcaaatggattcaaggtgactct<br>gctgtataaaatagctcctagattcaaaaggcaaacggcatgagcaatgggtgtaataagattgtacg<br>tgatggctaataggggttcttttcttctgtctgatgggtgaatatactgcttccagtttctgctaa<br>tcgggaaatagtagtctagccttgacagggcagtttgaagagagaaaaagagacagatggacac<br>agaccataccaagtccctatttgogactggaatctcttctagtgattttccaggtctcttctcct<br>aaatgatacctcacacacacacacacacacacacacacacacacacacacacacacacacacac<br>acacacacacagaggcttgagagaaaagagagaaggagaaagctgttttggaacaggtgaagaaa<br>cagcagcaagaagtacctcaggggcaactttaggccaagaagtgaagaaacagtttctagctgatgc<br>cgcaggaccgaagcagggcttgaagaatgaaagctgggggtgctccttcccagagccctgac<br>caagttatggcagggctgcatgcttagctgctcagtcagggcacttgccgggagcagatgttgcca<br>cagttctcatcctgcagatggaggaaatcccaggacagcctgccacagcctgctggctcataaagac<br>tacgtgctctacgcgatgctagagaaaatggggggacacactgctgcaaggagctgtggcaactt<br>gccacctcaccagagagctgctgtctgaagcgtcttccagatgcaacagaggctgtgctcagaa<br>ctgattgtggcagcttctggccctgaaggccttagtgattaaatttgactccccccacctt<br>gtttgtaaagttactgtgaccttccccagagatagaaaaatcttgtcagcttaaaaaggaacat<br>tgtcacctgtgtgctgctagactcgtgtctctgcagatccaagtgatctatctgttggggccatc<br>caatagatcagtcctcccaactcctggagttccttagtcatggccatgtgggctgggagttcttg<br>gaaaatgctgctcccaaatcaggtaggggataaccaggcaacaaatagatgagcagcattgcattctt<br>aacctctgttacctgtgctgacagcctagtgaaccagctggattgctctgaaatccactggct<br>gattccagactccataatttgcaaatcagaagggcctgatggttcttctctcctggctgaaactgt<br>ggtaatgacctggctatgtaccctcagaggatgaaacacttgacattcagattccttctgcatg<br>tcaattttagaatgtaccaaatattatttctcttttgccagtcacctccccctgttcagggttgt<br>gttgtagattttaactcttaataataataaataatgctttaaagcagatcattccgctgctagaaaag<br>tgagagtgctatccgagaaaaacttttgagttctccttctctgtcccatgtgcagaaaagcagacat<br>ataagctaaatgactcttactaaatagagatcttgcttctcacatttatatcccaggggaaatc<br>ttccttgtctagagtagataatcgcttaaatctacttttcttaccttagaaaaagcagacaat<br>tcagtggttttgctagtgtaaaatctctatttcccccaatgtctcagttatatttcttagctccctt<br>taggcaactgaaagtctgtgatattctctatagttcttccctgtaaaatagctccattagca<br>ctgaatcataaaagcaacttaaatgtagtcagccagataaaatgcaatttcaaaagtcaatgat<br>atthaaacttttagaaaaacaggtgaagccacagtttgccaacttggcacttccagggtgatggaa<br>tcaaaagtgggagtgctggcattgggtatacaacatttttaaagtagctggacatggaatctggcc<br>atthacagttatattgttagaccaccacagaaacagaaagcaaaaaagctccattaaagtccata<br>tttccaagaaatgtttggttcacaattcaggtgcaatttcttcttggatttctgcaagaaatgg<br>gtattagaacataaattggcataatgcccgttttgggttcttcttctgattctgcaaaagtacaacaga<br>ttctgacctttattactcaaacctacaagtgacttaagatcgaaaaagagcttcaggggttggta<br>ggctgagggcaccggatttgggttctgattagttctatgttggttttctcag |
| 4436        |      |                                                                                                                                                                                                                                                                                                                                                                                                                                                                                                                                                                                                                                                                                                                                                                                                                                                                                                                                                                                                                                                                                                                                                                                                                                                                                                                                                                                                                                                                                                                                                                                                                                                                                                                                                                                                                                                                                                                                                                                                                                                                                                                                                                                                                                                                                                                                                                                                                                                                                                                                                                                                                                                                                                               |
| 5086        |      |                                                                                                                                                                                                                                                                                                                                                                                                                                                                                                                                                                                                                                                                                                                                                                                                                                                                                                                                                                                                                                                                                                                                                                                                                                                                                                                                                                                                                                                                                                                                                                                                                                                                                                                                                                                                                                                                                                                                                                                                                                                                                                                                                                                                                                                                                                                                                                                                                                                                                                                                                                                                                                                                                                               |
| 5736        |      |                                                                                                                                                                                                                                                                                                                                                                                                                                                                                                                                                                                                                                                                                                                                                                                                                                                                                                                                                                                                                                                                                                                                                                                                                                                                                                                                                                                                                                                                                                                                                                                                                                                                                                                                                                                                                                                                                                                                                                                                                                                                                                                                                                                                                                                                                                                                                                                                                                                                                                                                                                                                                                                                                                               |
| 6191        |      |                                                                                                                                                                                                                                                                                                                                                                                                                                                                                                                                                                                                                                                                                                                                                                                                                                                                                                                                                                                                                                                                                                                                                                                                                                                                                                                                                                                                                                                                                                                                                                                                                                                                                                                                                                                                                                                                                                                                                                                                                                                                                                                                                                                                                                                                                                                                                                                                                                                                                                                                                                                                                                                                                                               |

Fig. S2C. (*continued*)

## Intron 2 Tissue- vs venom-type genes

(bp)

tissue-type 6294 gtaagtgtgataaaatccctgataaataataatggtccctttaagaaggtgtgtgatgatttgaag  
aggaggagatgaaactggcaccagtccattagctggaccgctggggagggaatcctcacttacgtt  
gctaacatttggaaaatgaatttatgggaggtgtgggatgaaggtggtgttggattgtaattct  
gtggacagaaaatggaaatgacttcaactaaactggagtgagtagactaaagatttccagcatg  
actacactgaaaaatgttaagtgaagacagtggggatctcttagtgccaggtttgacatattga  
gtttcaagatttcccaggattttttttataaagcagctgcagttatgcacaacagattttgct  
ctaaaggagaaatgagataaacacctgtttttataaacttcaagaacaaccttatcaaccag  
atgtgttaagcgtacagctgcagatcacacaggctgtgaatggcaggagtccaatctacatggag  
actatccaactaaagaagctgtcaggagagaatataatggactgaaatgttggcatttttagctt  
ttttaaacccttacttaaaactaagatcagacatctcagcaactctgggaaataatagttggaggaa  
6944 tttaccatgattttcaaagtgaagtcactttgaaaatttctgtctctcatcttttggctgacag  
acctttgacccatgttgttttgctcagacacaaaataaagttaccaaaactatcagtgcttaagt  
tctaaggatcatggcactggccaactgaaaagataatttcagaagcaattatgagaaggttgat  
ccatcttttaaaggccacagtgtacatgcctatagggaaatgagccactgaaagttaaggt  
gatttctctgcataaaatagtgacagcatttgctgttgggtgtttagaagaatgcctgcacct  
taagagagtctgggagcatttttacaaataggccatttataaccaactgcacttgctgcatgtt  
ggacattttatgtgaatagtgcaaaaaatggaatagaatggaagctccattgtgcttttaaaatt  
tagatcagccatgtcctgaaatctgcatctgtggaatgattgcccacactggatggggatattgg  
aagctgcagttgggaagctatcaggttgaagtaggttgttaacaaaaagttctgttatgtctaga  
gccaggatcctctgattttggcagtggtgggtctaaatgcatttgtcttttagccaaacgcttat  
7594 agacttgggtcttgaagaaatttctcagaaagaaatctctcagcaaaaacataatttgtgaaaa  
tatttagtaaccttcaaatctatacagtaacttgcgaaaatgttggcaggaaggaaggaaggga  
ggagatgtagaatcaggcactacagtaaaagaaatgagagggatcaggggaaatagctactg  
gcaagagggtagcacctatgtttcatagtagacagagaccaggtttaaaacttagtacaatcct  
cacagccttgaagcttcaggcagtagaagttcacctaaactgggatattccacagcaaaaact  
tgctttccacagtgtaaaatctgctggaatctcttagtttggggcattcagggttggcac  
ttgctgtgttcttagagctagacagcagcagggggcgccttttctcttaccacgggttagttc  
agttgcaatcaggttttttggcctggtgaaacttgaggaggtgttgcaagcagctcaggggagca  
taactttgtaagagcacaccctataatgtgatctaattgtgcttctgcttttaacatttttgc  
cctgaaaaatgaatacgtgggttcccttctctgtgtatgtgagaaaaaactcagtgcaaggtt  
8244 gatctttaaactgcttggcctttatcttgaactgccaatgcatgaataacattcaagcatggc  
ttgtattttgtggtgttagtctgtcacaaaaggagttgtttggattctttagagctcctgggactga  
tacaactctgcagaatgctgtatttcagaaaaaggccagcaaggggttttgaggttatcataatt  
acatttttccctctgctttaaaggttaggcgttatgtcactagtcaaccagtagccagataaaaac  
caggcttctgactgagctctgatctgattgacataatgaataatcaagagatgtgatagcaag  
caactgcaaaacagttgtctgcagtaaccttgcaacaactaggtataaagatctgagggttctgcgg  
gaccatagaatagcttatgggggggactcatagtgaagctttaaagatgcagatgatcaagttg  
cactatttaagacttcaatttatcatgctaaactgcaaatgagaagggccagcaaccaagtaata  
tgtttctttctgctgtgatcagtgaccagctctcttaaatagagattgacaaaatctcttaa  
ttcccttgcttctgaatttgtatcttaaagttagaatagtcagagtagctctgtcattttgac  
tissue-type 8894 gatttttcttgtttgaatatcattcatatgaaaaggatagaatataagaatagagctggaaggggttc  
**venom-type 1009 -----gcaagttccctttcttaagatcttattctggttaa**

tissue-type 8959 ttggaggt--ctcttagtccagcccgc-tg--ctcg--agcaggagaagctataaccagttggtgpc  
**venom-type 1041 atgggggtggtgtccagagcatcgctcttgcccttgaaaagagccgggggcagaaaaggggaccc**

tissue-type 9017 gaacctatggcatgctgcccagagggcgcactcagagccctctctgtgg-gcacacagccatgc  
**venom-type 1106 ccacctct-gccttgcggccagccagAACctctgggtgagatccctggcagacacagccctgc**

tissue-type 9081 cccggagatggcaaccatccctctttaaccagctgcctgctaactcgtgaggtcccataggacc  
**venom-type 1170 cac-ctgcacgctcagagcatgtgggaacaggctccctgggga-gggcaaagggtgcaggggttgc**

tissue-type 9146 ag-atgcatccagcacccatgcgctcgctggcctcta---tgtccaggggccaatggtg-tca  
**venom-type 1233 agcacgcagcgtttccccca-ggggtgaggggctggaggggagacatagcccggtggagaaga**

tissue-type 9205 ggcagcagccgcgccagccatctcaccttgccctgtgacaatggcacccccgccttgctcgc  
**venom-type 1297 ggagggactaccggccccccacctgtcttcccccaaccaggggaaggaaggctgcgcttggct**

tissue-type 9269 tcaccccacaggacaagcctcctgccactgcccacctgcccagagaccccctggatctccccca  
**venom-type 1362 taaggcaagagg--agctctgaaggccagggcagcgtctgactcttttctcccctcctcag---**

tissue-type 9334 accctgccggccccccacaggtgtccctcccatgagcaacatcaaggtggccatgcccattctg  
gccacaccatcca atctgcatgaccaccacagccatgccaccagtgggccacgcccact  
ggcaccggcgataaaatagtggttttgggtgacagttgggcaacttggtctctaaaaggtctg  
ccatcactgagctataccatttccagacaagtgaactgtctagtcaggggttaggcaaccttggct  
ttttatgacttgtggactcccagaatctggggagtgaagttccagagtcataaaaagaccaagg  
ttgcctaccctgggtctagctctctttaaaccctccaatgagggagcaccatgatctctgga  
aagcaaaaagcaatttcttaccttttttctgtgtgtggtgcataggtctgctttttag  
Tgttctgttgtaaacagattggcaagttaaatgaacacgtaacttccaaatgaggcagaagaat

Fig. S2C. (continued)

**Intron 2** Tissue- vs venom-type genes (*continued*)

|             | (bp)  |                                                                                                                                                                                                                                                                                                                                                                                                                                                                                                                                                                                                                                                                                                                                                                                   |
|-------------|-------|-----------------------------------------------------------------------------------------------------------------------------------------------------------------------------------------------------------------------------------------------------------------------------------------------------------------------------------------------------------------------------------------------------------------------------------------------------------------------------------------------------------------------------------------------------------------------------------------------------------------------------------------------------------------------------------------------------------------------------------------------------------------------------------|
| tissue-type | 9854  | aatgctttttgctagaattattatcttaatggagtggtgccggcaatggagtttactattctaggt<br>atattctagggggcattctgtgtttgatgtcatgagataactaacctaaatttcatgtaattcata<br>attacatagggaaataggcaaagaactcagaaataagaagggtgcctctattcacttttcatatcat<br>tataattatcagtttttagaagttgataattctcccactgtccttcccccttctcatatttatac<br>atttgaaagtgatgaagcaaaaaataaaactctgtagaagatgctaaatgtctgcccagctattat<br>gtgtacataggggtgcatctctttggatgatccacagattataaaaaaaaaaaaaaaaaatcctaaatca<br>tttaggacagccatttagttatcttttagatagatgggtgagatgggcggtacgtaaatttaataaa<br>taaatagtttgtgatgaagttaaagggtaaattagttgctcaggcaaaagacagtaggtacccac<br>gactttcactactgagctttatttggggatacatccatcccctcagtggtgtacgtgggtcataag<br>atctcattacatggaaaaaacctgttgaatttggtttcacagcatgagagtcaaggtgttgagatg<br>10504                                             |
|             | 10504 | ctcagtcctttgtcctttgtccattagttttcttctgaatgcagatgcataaggaggtagataataa<br>tctttcaactcagcgttattatggcaaagtttctgtgctcttaatgctcagaagaagtgata<br>atcagcaagggtgtacatgtctggctatgtgccggcaagtttcccagacactaaattgtttaat<br>tctcagttttagatagctgcattttaagggttaagggtcaacctgaaaggggaaataaggaaagatt<br>ggcccacactaatcccacatgtcttgctagagcttggactggacagaaggttgcctgtggatggaa<br>gtgctccttttagctggagatcgccatcactacacatttctcctctgagcaactgtcctt<br>taaataggcacttaggctgggagcgcgtagaaatcccgggagggcttctcctcagatgggtggcc<br>ctctcagtcgcatgaccaagaattaaacttccgcaattatcaagagcactctgtctcctctc<br>cctctccccaccccccagcagctgctgcttccagtgagcaacctttagctggtttgtcacag<br>gttcaggactgttcaaaacgcttactggtttctgttttccatgatgcaagcaatttgtgcttt<br>11154                                                                       |
|             | 11154 | tatcacactgggttatcaacgtagacactgcaggccttggaaaggcaaaaaaaaaacacttaggcc<br>gaacagtaattcctgctctcctaaaggactccattagctacttctaattgtgctgttggaggaa<br>caggcagaagcccgtgttttggtttaaaagatctcttatttggtttggaaagacagattttgtactc<br>ttgtattgagccatgcgtctctatctcctgctcagtttggcaatgaatcattagtttagccta<br>ctcacggttaggatgtgtgtgtgtttgtatgtatgataaaatttggtaaggctgggggcttga<br>atctattcctaaaacgcttctaacattagaacttaataataaataatcataatgaggtagatccgg<br>tctctgcataatttggatcagccttctcaacgctaactgtgggctgtccagatgctttggacatga<br>cagctagaatttcagccattagccatgctggctggtaactgatgaaggctgagctagatgttgggt<br>ggctgggctggaaataaaatacataaatttctctggtagaacctccccgctttattgacgaagtta<br>11804                                                                                                                              |
|             | 11804 | atctattcctaaaacgcttctaacattagaacttaataataaataatcataatgaggtagatccgg<br>aataaataaggccactgaagttcttttgaacttagtttcaattggattgtacctcaatccaatc<br>cagaattactcatatcaaatctacaataattgaagcaaatgatgaggcccttgtgtaaatatg<br>aaattatgaaaatgttttgtaccagccacagtcacaaccagaatgggtgacaacatttttgg<br>agggagtgaagtgattgtttgtccttgtagtttagaaacatgaatgagggcatttctgtgctgg<br>agtaaaactaaaactaaaacatttggagaggggtcaggaaatggatggcgtgggtttatggaag<br>ggagcagggccttccctcccattaaagtctcttggattttggctgaaaactgcatgactagaatc<br>tagattctgcttctctctggctacttttggatagctctggcagtagcatagggccagaagtta<br>aaggaagaagcatatttccagctacatggcactgtgtgacgatcctggaaaatgtgatattcc<br>cactgcagaaaaatttctgaggaaaattgaatctgggtctgctcgacagctgtgcctttgagagaa<br>tctgttaggctaacatcaaataggagctgaggtatcaaataggagctgaggtatttacatttta<br>12454 |
|             | 12454 | caggtattttacactgtgttggaaacctctgggtttctgaaatgaccaggttctgtgtccattcac<br>ttcagggtaaaagcgtctctaacaagctgccaccatgccatgagatctgtggcttctgtaatcat<br>tttatttccctctgcaaatgcattcaatgtctagctggtaaaattcagacaagacagatgcta<br>aacttgtcagtgattcatcatatcttgcctcatccacaatccctatagctgcttctttaggcttt<br>aagtacatttttaagtaggctaataatgcatcttactgagagcctgtatttggctgagcctgttgggtaa<br>gaatccagtagaaggggcagacttagtggctctgtgtcttaagctatgtgtatactgtattgt<br>aatgttaatgttagacttcacagaataagtgtaactaatccctccttttcttctcctttccct<br>12909                                                                                                                                                                                                                                                                          |
|             | 12909 | ttgttttctag                                                                                                                                                                                                                                                                                                                                                                                                                                                                                                                                                                                                                                                                                                                                                                       |

Fig. S2C. (*continued*)

### Intron 3 Tissue- vs venom-type genes

(bp)

|             |       |                                                                                                                                                                                                                                                                                                                                                                                                                                                                                                                                                                                                                                                                                                                                                                                                                                                                                                                                                                                                                                                                                                                                                                                        |
|-------------|-------|----------------------------------------------------------------------------------------------------------------------------------------------------------------------------------------------------------------------------------------------------------------------------------------------------------------------------------------------------------------------------------------------------------------------------------------------------------------------------------------------------------------------------------------------------------------------------------------------------------------------------------------------------------------------------------------------------------------------------------------------------------------------------------------------------------------------------------------------------------------------------------------------------------------------------------------------------------------------------------------------------------------------------------------------------------------------------------------------------------------------------------------------------------------------------------------|
| tissue-type | 13117 | gtgagactgtgggttaaacagtcgaaggcacttttgacctgcagttttgtcttgttttctttaata<br>aattccactatggatgggtttttataaattgggaagggccaactgggtggtcttggaccacatccag<br>ctcctaataataaccacttgtatctgttgggtgtggaaagaatagagaaggatgaatcatagaatt<br>gtaggactggaagggacacagaagtcttccagtcctaactcctagctcaaggcaggagccttatct<br>tatcccagttaaatggtaaatgtccagtcctattgaaaacctctagtgatagagcaccacagcac<br>caggaggtgaggtattccattgattaattgttctcactgtcagaaaaatttcttcttacttctagg<br>ttgcatctctctttaacaagcttacatccattacttctgtgcccttagagaataaataaataccct<br>cttcttctgtgacagctcctcaaatagtaagactggtattatatacgtctccccctcccccaat<br>ccttctttcaataggctagacatgcctagcttttacctatttttaatgtgaccagagtaacgtg                                                                                                                                                                                                                                                                                                                                                                                                                                                                                                                                         |
| tissue-type | 13702 | actaggtcatgttggctcctgggcaatatgagtaggtcaggggtgcttctgagattataaaaagtg                                                                                                                                                                                                                                                                                                                                                                                                                                                                                                                                                                                                                                                                                                                                                                                                                                                                                                                                                                                                                                                                                                                     |
| venom-type  | 1619  | ----gtca-ggggctgttcgtgctgaggtgacgggctggggtgggggtgtcaggatagctcttg                                                                                                                                                                                                                                                                                                                                                                                                                                                                                                                                                                                                                                                                                                                                                                                                                                                                                                                                                                                                                                                                                                                       |
| tissue-type | 13767 | cgccctaaatataaaaaacaaaaacaaaagtaaccccccccccaacaaaaacagaaacag-aaaagt                                                                                                                                                                                                                                                                                                                                                                                                                                                                                                                                                                                                                                                                                                                                                                                                                                                                                                                                                                                                                                                                                                                    |
| venom-type  | 1678  | ggggccaggaagagcagagccagccttggactgctcctcggggtgc--aactgaacgggtggctgt                                                                                                                                                                                                                                                                                                                                                                                                                                                                                                                                                                                                                                                                                                                                                                                                                                                                                                                                                                                                                                                                                                                     |
| tissue-type | 13831 | aattgcccctgggtggcctttgttattttcaagaactataaatgccccttggctactgtgatgctct                                                                                                                                                                                                                                                                                                                                                                                                                                                                                                                                                                                                                                                                                                                                                                                                                                                                                                                                                                                                                                                                                                                    |
| venom-type  | 1741  | ctctccccttgggtag-----                                                                                                                                                                                                                                                                                                                                                                                                                                                                                                                                                                                                                                                                                                                                                                                                                                                                                                                                                                                                                                                                                                                                                                  |
| tissue-type | 13896 | catgttctccaaaggggaaggattgtgaagtgaagtgatgctttatacacattaatttaaacctga<br>atataatttcccctgaaaattcagagaccactttttgcctatacttctatatacatatgtacaca<br>cagagagacatatagattatatactcatgtaataacaacctacatttcaagtttccgtttcctgt<br>gtgtgcttcactttctaaaccattttaaaggtagtttgctgataaaactaaatagacagattact<br>tgccccagatctgttgttctatgtataccttgccttaattctctttaaataaacatccacgttttag<br>aatctatataaccggatcaaaggatctgtgtgagtgaaagcagaccagttcgtgaaggcaatctg<br>ttttgatgagcagggcaaaaaatcttttaacctttaaacttgtggacatgaggcctatttacgaa<br>gtagtccttgtgaaatgactgcctcatttagtgattgtttgcaggactatagggatgaaaaagt<br>aaccttataaccaatctaatttgcgggtttgtaagcaaggaagctgaagtacgataataaac<br>atagtcatgggtttcacctaatagaccgatgtgataacaaccaatttgctaaaccaattgtgat<br>gctaaatgaagactaattgtactttttggcatgggtgattcatatcaggaatttggcatttctta<br>ctgcttttgagcattttccaatacatctcctgctcaaaactgagtcctcatgagtttagagcagtg<br>ttcttacacttttaagatgtatggattttaaactcccagcatggctgctggggaattttggtagtt<br>gaaatccacatatcgtaaagttgccaagtttaagaaactgggtttagaaggtaaaatgaggata<br>ggatggcaacgtaagaatgctaactcatctagccttcattttgcccgctctgttttatcgttatt<br>tggcttatttgttttggtagatggctgttgaacattacccatttgggaatgcaactcactgtccc<br>tctttttcttctcccttctatgtcatccttttcttttag |
|             | 14546 |                                                                                                                                                                                                                                                                                                                                                                                                                                                                                                                                                                                                                                                                                                                                                                                                                                                                                                                                                                                                                                                                                                                                                                                        |
|             | 14936 |                                                                                                                                                                                                                                                                                                                                                                                                                                                                                                                                                                                                                                                                                                                                                                                                                                                                                                                                                                                                                                                                                                                                                                                        |

Fig. S2C. (continued)

## Intron 4 Tissue- vs venom-type genes

|             |       |                                                                                                                                                                                                                                                                                                                                                                                                                                                                                                                                                                                                                                                                                                                                                                                                                                                                                                                                                                                                                                                                                                                                                                                                           |
|-------------|-------|-----------------------------------------------------------------------------------------------------------------------------------------------------------------------------------------------------------------------------------------------------------------------------------------------------------------------------------------------------------------------------------------------------------------------------------------------------------------------------------------------------------------------------------------------------------------------------------------------------------------------------------------------------------------------------------------------------------------------------------------------------------------------------------------------------------------------------------------------------------------------------------------------------------------------------------------------------------------------------------------------------------------------------------------------------------------------------------------------------------------------------------------------------------------------------------------------------------|
|             | (bp)  |                                                                                                                                                                                                                                                                                                                                                                                                                                                                                                                                                                                                                                                                                                                                                                                                                                                                                                                                                                                                                                                                                                                                                                                                           |
| venom-type  | 1837  | gtgaggaagggggccgaacagcggtgtcctgggtggctgggtcagaggggtgggggaatggggga<br>gaattgctggaggtggaagatgacaagcagttcttagttcacacaaccctccctccctcctggt<br>tttcttgcttgcttgctttctccaccttttattttttacaataactcaaggtggcgaagat<br>attctcctcctattttccccaccacaacaaccctgtgagggcaggtttggctgagagagaggacc                                                                                                                                                                                                                                                                                                                                                                                                                                                                                                                                                                                                                                                                                                                                                                                                                                                                                                                               |
| tissue-type | 15054 | -----gtgaggac                                                                                                                                                                                                                                                                                                                                                                                                                                                                                                                                                                                                                                                                                                                                                                                                                                                                                                                                                                                                                                                                                                                                                                                             |
| venom-type  | 2097  | agcccaaacgtcacccggctcattttccacactggggttctgcaggggtcctctgagcaggaggac                                                                                                                                                                                                                                                                                                                                                                                                                                                                                                                                                                                                                                                                                                                                                                                                                                                                                                                                                                                                                                                                                                                                        |
| tissue-type | 15062 | agagagcttttctgattgaatttggagaaggattatacaattataccaatagt-acccagctggg                                                                                                                                                                                                                                                                                                                                                                                                                                                                                                                                                                                                                                                                                                                                                                                                                                                                                                                                                                                                                                                                                                                                         |
| venom-type  | 2162  | agaggtgggggtccagacctgtgcaggcacctcctcagaggccaggcttcttcgcctcactcct                                                                                                                                                                                                                                                                                                                                                                                                                                                                                                                                                                                                                                                                                                                                                                                                                                                                                                                                                                                                                                                                                                                                          |
| tissue-type | 15126 | c-acctgtatccacctg-ttcaccocaaaatcttgtg--gtcctgttctg--tattgggaa-ggg                                                                                                                                                                                                                                                                                                                                                                                                                                                                                                                                                                                                                                                                                                                                                                                                                                                                                                                                                                                                                                                                                                                                         |
| venom-type  | 2227  | cttcctggagcccccagcggcgggccaagtctctgagcctgctggctatgcagactgcaactgggt                                                                                                                                                                                                                                                                                                                                                                                                                                                                                                                                                                                                                                                                                                                                                                                                                                                                                                                                                                                                                                                                                                                                        |
| tissue-type | 15184 | tttttcttgctagccataggtctggtaatttaaactctatttgattgacagatgatgtacgttta                                                                                                                                                                                                                                                                                                                                                                                                                                                                                                                                                                                                                                                                                                                                                                                                                                                                                                                                                                                                                                                                                                                                         |
| venom-type  | 2292  | tatttctctttccag-----                                                                                                                                                                                                                                                                                                                                                                                                                                                                                                                                                                                                                                                                                                                                                                                                                                                                                                                                                                                                                                                                                                                                                                                      |
| tissue-type | 15249 | ctgtccagtaacaggagggtttaacttttcttcttttagaaacctcagttacatcaacattgctt<br>cagcaagagaagcattccttatgggtctgcatctgtgtcataaaatgaatgtgtgggtatctggg<br>gtgtttacatgctctcaatctctgtcatggaaatttccactggctgcttgggtacattctttgggta<br>ggtgcagttgagaaccaacagctagttaagaaacattgtattgctgttttgctccaactgagtaa<br>acaggtgggttaggttttgctatgtccctaggtgctctgatcccttagccccaacctttgtatt<br>ataagtttacatgatcacgaaaaatgattacaatcaagagagctactctgggtgcaatgggtgcaa<br>tggctaaagtgtctggactagaatcccagagactgcaagttctagtctctcttaggtgtgaaagt<br>gagttcagtgactttgggccagtcactctctgcaacctaaatcaccatacaggtttactgtggga<br>aaaatagaaggcagaaacattgtatatttgcttgagttgtacaaaataacagtgggatataaa<br>tctaataataaatagatccgtataaggcagagctctgctgtcaacgcaagttatattcattttca<br>tgtcaatatgtacaaaatctccctcagattttgctatttagtcaatgttgggcaaagggaata<br>gagctggggatattgggggcaaggccaaaagatcagactttttaaagcataagatttaggcataa<br>catctgaacagtggttttaatttgatcagaaagaaatgtgctttctttctgccccttggctgtcat<br>aattaaggccaacttcaacaaccagatgatcctatgggtgttttaagcttggctgccagataaca<br>tttccagtggaacaaggataaatggaattggtagtctggaacatttgaaaggctgaaacaggcagtg<br>ctggaaggcagaagagcatcctttattaagtttctgctgaaagtggggtggtaaacgtggatg<br>tgatctttatatatttagttagtcttctaactcctgctcttctttcttcttctgttag |
|             | 16289 |                                                                                                                                                                                                                                                                                                                                                                                                                                                                                                                                                                                                                                                                                                                                                                                                                                                                                                                                                                                                                                                                                                                                                                                                           |

Fig. S2C. (continued)

**Intron 5 Tissue- vs venom-type genes**

|             |       |                                                                                                                                                                                                                                                                                                                                                                                                                                                                                                                                                                                                                                                                                                                                                                                                                                                                                                                                                                                                                                                                                                                                                                                                                                                                                                                                                                                                                                                                                                                                                                                                                                                                                                                                                                                                                                                                                                                                                                                                                                                                                                                                                                                                                                                                                                                                                                                                                                                                                         |
|-------------|-------|-----------------------------------------------------------------------------------------------------------------------------------------------------------------------------------------------------------------------------------------------------------------------------------------------------------------------------------------------------------------------------------------------------------------------------------------------------------------------------------------------------------------------------------------------------------------------------------------------------------------------------------------------------------------------------------------------------------------------------------------------------------------------------------------------------------------------------------------------------------------------------------------------------------------------------------------------------------------------------------------------------------------------------------------------------------------------------------------------------------------------------------------------------------------------------------------------------------------------------------------------------------------------------------------------------------------------------------------------------------------------------------------------------------------------------------------------------------------------------------------------------------------------------------------------------------------------------------------------------------------------------------------------------------------------------------------------------------------------------------------------------------------------------------------------------------------------------------------------------------------------------------------------------------------------------------------------------------------------------------------------------------------------------------------------------------------------------------------------------------------------------------------------------------------------------------------------------------------------------------------------------------------------------------------------------------------------------------------------------------------------------------------------------------------------------------------------------------------------------------------|
|             | (bp)  |                                                                                                                                                                                                                                                                                                                                                                                                                                                                                                                                                                                                                                                                                                                                                                                                                                                                                                                                                                                                                                                                                                                                                                                                                                                                                                                                                                                                                                                                                                                                                                                                                                                                                                                                                                                                                                                                                                                                                                                                                                                                                                                                                                                                                                                                                                                                                                                                                                                                                         |
| tissue-type | 16382 | gtaagtgacctggattatccctccoctaagtgggtgctgggtgatcttctccttcttcttctta<br>gatcactacaaaataagaattgggtggtgctgttctttaaagaaccaagtgttcatctaaagaat<br>tatacttgaatccatctctcttagctacagtcacacatgtagctttgacagctggttctctt<br>atgctttgaggccattttgaaactggttacttataaaaaatgctcaggaacagcatggaattaac<br>cgaagcttttacccttttcaactggattctagctgaaatttctcctcaccatgcatgacccc<br>attgcccctcccattctcttggctgctttgatgaaaacttgctgagtttacaccaacttcataga<br>tacctaaccattaaggctgtgcatggaagctctgctatctcacttagaacaaggagggtttgccc<br>ttcatgaaacaaaagtcagacacccagtcagagagtggttctgagtggaattaactt<br>cgcatatcaatcatgaaaggtggaataaagagagttatcttctcagccagcactcccagcatggt<br>gctttttatagtgcttttggaaatctatcccaggctatgggtgtgcagctcggggccaagcag<br>17032 atagtagttcaaagcatctggaataactgcattgtgggtgactgtagatgagtggtgtgggaat<br>ggaagtagctgacttgttaagtgtgaaactgacatctaccttgagactgtgtgtagtattatgaa<br>gataaaatagaattcttctctgtacattagccagcctaatacaaatggatatacttttcaatt<br>tctagcttataaaataaagtgcacatgctcactgtgaggggtatataagatgggttataggtgca<br>gttggcttgggaagctggggaagaagagagagagagagagagagagagagagagagagagaga<br>atggggactggggaggatatttttagttagttgtgctgttttcatacatgctcagcttaactgca<br>attctcatgaattcacatgtggagccatcagtggttgcgggggaatactgctagcttgggtt<br>tctagcttctgggtgcacatggttctcagctgaaatggcagagtgactcagagtgtaagagtggtg<br>tgattgagtgagcaccgtggccacagctcttccctctgggactatagcttccactcctcaggtg<br>gcttactttgctctgcaaatctccatctcggtatcgggttccctctgggttgggttaagctgaaat<br>17682 tccctctaatgcttgatgoccttttttcatgggtgctcctctggatgaatgtggcattaatgaatgt<br>aaaactttgtgaaagtttctctgacgtaaacatgcttccctcagcctgctagtaattctgtgtct<br>tgtgatgcttactttgcttgtggttaggagagaaaaactgatgccaccaagaggcttgaacaag<br>atccacggcaccatcctgtccattaacctcagggacttctcctttattacagcaactccttctc<br>taaagtttaataaaactgttcttaggaagaaaggagtagtcttttggattaggttttgtccaaga<br>atattgctgttttccacgtgcatctctcagaactcactgctgggagcagtaggtgcaagttc<br>acctgattttctccttggctgggattgctgctctaggtctgtgcacattatcaaaagtacacagg<br>aagaccttaatgtgtgtgggttaggaatttgctttgcagaacgtcccaggggttctctagggcagag<br>ctgagaaatcacttgctgactttggcgcatagtgtagacaatataaatagatgaactggcaa<br>actgttcagtagagttggtttcttaggatcacctgttttaataagagggtggaacccaactca<br>tacattactttctctggcatttctgctgcaggggaaggggctcagattctctgttaaaaaataccgt<br>tgtgttatcttccaaggaatgatagttagattagcccatctgcttacctcagctgtagaagt<br>ggatataattttaacctctagtagcagcaagtgtagggatcagagttcatctgctgtatgtag<br>tagctcacagagttcttggatgttagtgataaacccctataataatggggttcagacgggccaatg<br>ttatctatggtccaagagcagagcagagcaattgaggctgaaactgcataatagtagctgacctc |
| tissue-type | 18657 | ctttttcatagaatgcagaattacctcccctcttctcactggtatctgcctacaggtggacagct                                                                                                                                                                                                                                                                                                                                                                                                                                                                                                                                                                                                                                                                                                                                                                                                                                                                                                                                                                                                                                                                                                                                                                                                                                                                                                                                                                                                                                                                                                                                                                                                                                                                                                                                                                                                                                                                                                                                                                                                                                                                                                                                                                                                                                                                                                                                                                                                                       |
| venom-type  | 2350  | -----gtacatggggggagg                                                                                                                                                                                                                                                                                                                                                                                                                                                                                                                                                                                                                                                                                                                                                                                                                                                                                                                                                                                                                                                                                                                                                                                                                                                                                                                                                                                                                                                                                                                                                                                                                                                                                                                                                                                                                                                                                                                                                                                                                                                                                                                                                                                                                                                                                                                                                                                                                                                                    |
| tissue-type | 18722 | caaaggagctttctgatgggtccagtggggaattg-tcagaaataattgctgagggtaaagcttgt                                                                                                                                                                                                                                                                                                                                                                                                                                                                                                                                                                                                                                                                                                                                                                                                                                                                                                                                                                                                                                                                                                                                                                                                                                                                                                                                                                                                                                                                                                                                                                                                                                                                                                                                                                                                                                                                                                                                                                                                                                                                                                                                                                                                                                                                                                                                                                                                                      |
| venom-type  | 2366  | <b>gctgggggttaacagaataagagagttgtaaggaccttggaggtcttctagtccaacccctggc</b>                                                                                                                                                                                                                                                                                                                                                                                                                                                                                                                                                                                                                                                                                                                                                                                                                                                                                                                                                                                                                                                                                                                                                                                                                                                                                                                                                                                                                                                                                                                                                                                                                                                                                                                                                                                                                                                                                                                                                                                                                                                                                                                                                                                                                                                                                                                                                                                                                 |
| tissue-type | 18786 | gcatgtcaaaatgcaaaaggcataaaaaaagcaggtgcataggaggccacatttctccattgtta                                                                                                                                                                                                                                                                                                                                                                                                                                                                                                                                                                                                                                                                                                                                                                                                                                                                                                                                                                                                                                                                                                                                                                                                                                                                                                                                                                                                                                                                                                                                                                                                                                                                                                                                                                                                                                                                                                                                                                                                                                                                                                                                                                                                                                                                                                                                                                                                                       |
| venom-type  | 2431  | <b>tcaggttggcctggggcagggc---tgggagggcggggc--aggagggcaagatggctgcttgagg</b>                                                                                                                                                                                                                                                                                                                                                                                                                                                                                                                                                                                                                                                                                                                                                                                                                                                                                                                                                                                                                                                                                                                                                                                                                                                                                                                                                                                                                                                                                                                                                                                                                                                                                                                                                                                                                                                                                                                                                                                                                                                                                                                                                                                                                                                                                                                                                                                                               |
| tissue-type | 18851 | agtgctgcccactttcttctccttcccttctccttactgaggttggagagcccattctctctcggg                                                                                                                                                                                                                                                                                                                                                                                                                                                                                                                                                                                                                                                                                                                                                                                                                                                                                                                                                                                                                                                                                                                                                                                                                                                                                                                                                                                                                                                                                                                                                                                                                                                                                                                                                                                                                                                                                                                                                                                                                                                                                                                                                                                                                                                                                                                                                                                                                      |
| venom-type  | 2491  | <b>cgaaact--cctctttcttccccctttgcag-----</b>                                                                                                                                                                                                                                                                                                                                                                                                                                                                                                                                                                                                                                                                                                                                                                                                                                                                                                                                                                                                                                                                                                                                                                                                                                                                                                                                                                                                                                                                                                                                                                                                                                                                                                                                                                                                                                                                                                                                                                                                                                                                                                                                                                                                                                                                                                                                                                                                                                             |
| tissue-type | 18916 | gagcagagaagctgacttttagggccatactggcagccaaaataaggcatttcattttcttaag                                                                                                                                                                                                                                                                                                                                                                                                                                                                                                                                                                                                                                                                                                                                                                                                                                                                                                                                                                                                                                                                                                                                                                                                                                                                                                                                                                                                                                                                                                                                                                                                                                                                                                                                                                                                                                                                                                                                                                                                                                                                                                                                                                                                                                                                                                                                                                                                                        |
|             | 19306 | aaaggagcagagttttaggtgggtcatatttgaagtgagacatgctatctgtaactggaag<br>ggaagtgagagcttctgcaagtttcaacttttgatagagttgtgtgaagtacagaaacaaattt<br>atttattttaaagatttatatggccacctttaaataaaacaaactcagcaagaaagaa<br>gaaatgctcaactccaaggacttctagagtttagatgcttatgctttagctaaagtcgcatatgg<br>tagcttctccttcttttcttcttcttctccccctgtgcactttctctctcctctctctc<br>tctctctcttggctgttttggttttcttccag                                                                                                                                                                                                                                                                                                                                                                                                                                                                                                                                                                                                                                                                                                                                                                                                                                                                                                                                                                                                                                                                                                                                                                                                                                                                                                                                                                                                                                                                                                                                                                                                                                                                                                                                                                                                                                                                                                                                                                                                                                                                                                                 |

Fig. S2C. (continued)

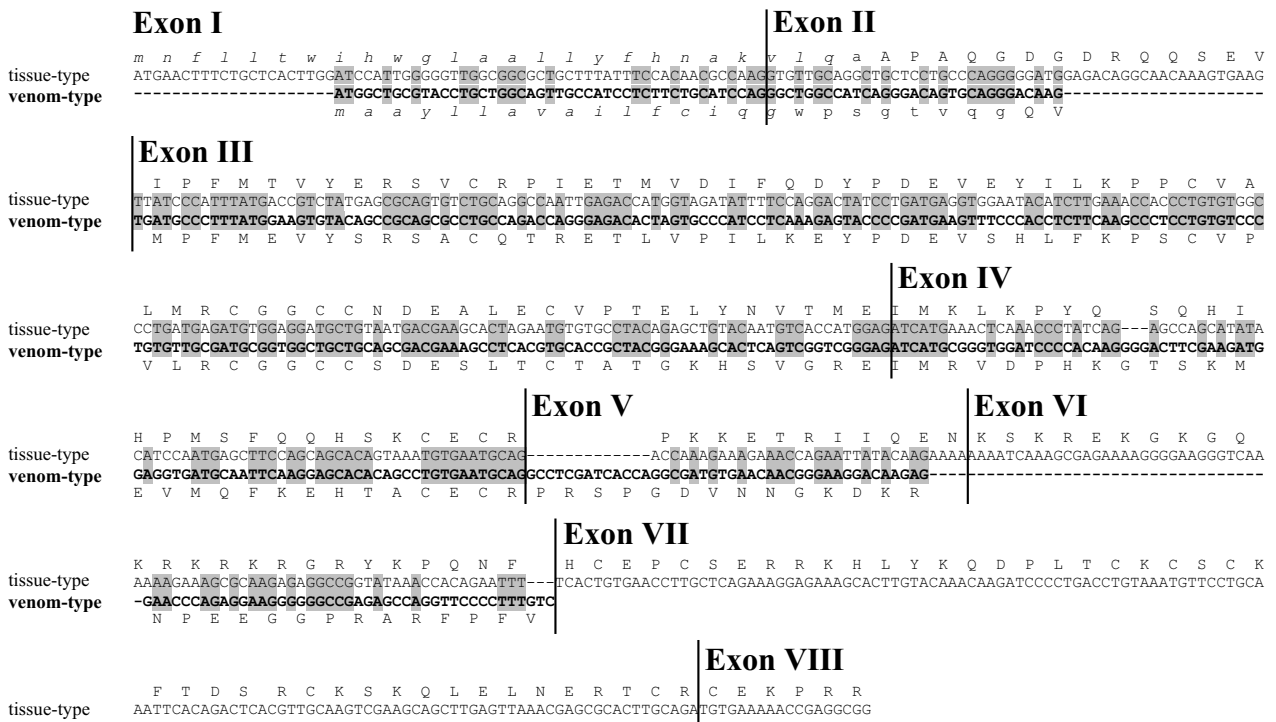

Fig. S3.

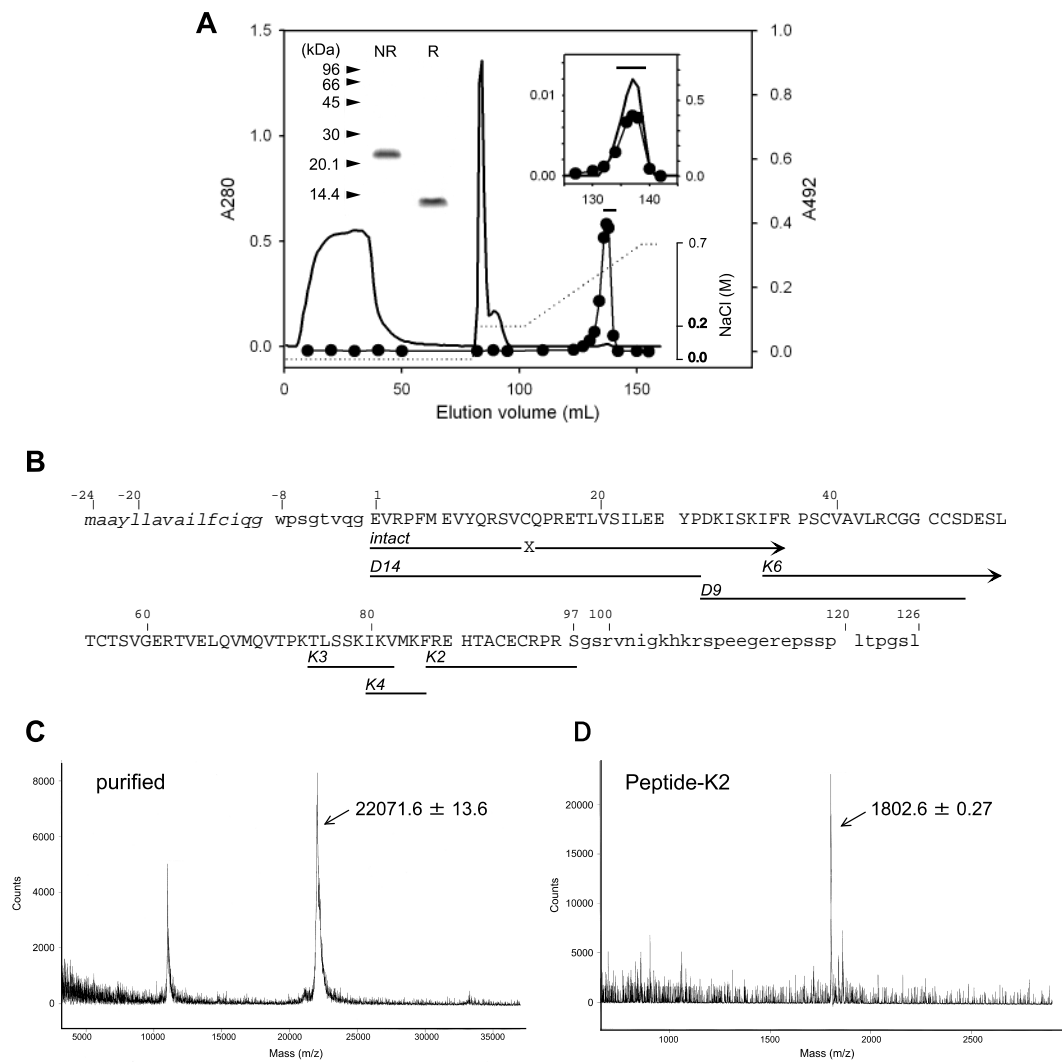

Fig. S4.



barietin (bp) -145 GAGTAGACCCGAGGGGAACGGACGCCAGGCC-----TTGCCACTCTGTGCCTGCTGTGCCACCGGCTTCTGCCT  
 apiscin -184 ACTGGCAGGCCCTGCCA-GCTTCTGGGCTTTGCCCTACTCTGTGCCTGCTGTGTCCACAGCTTCTCCCT  
 cratrin -217 CAGACAGCAGATCCAGGGGAACGGACTGCCAGGCCCTGCCA-GCTTCTGGGCTTTGCCCTACTCTGTGCCTGCTGTGTCCACAGCTTCTGCCT  
 Tf-svVEGF -197 GGAATGGACTGCCAGGCCCTGCCA-GCTTCTGGGCTTTGCCCTACTCTGTGCCTGCTGTGTCCACCGGCTTCTGCCT  
 Em-VEGF -173 CA-GCTTCTGGGCTTTGCCCTACTCTGTGCCTGCTGTGTCCACCGGCTTCTGCCT  
 Bi-svVEGF -185 GCCAGGCCCTGCCA-GCTTCTGGGCTTTGCCCTACTCTGTGCCTGCTGTGTCCACAGCTTCTGCCT  
 vammin -134 ACGGGGAGAAGCAGACCCGAGGGGACGGAC-----TGCCACTCTGTGCCTGCTGTGTCCACCGGCTTCTGCCT  
 VR-1 -131 GGGCAGGAAGCAGACTGCAGGGGAACGGAC-----TGCCACTCTGTGCCTGCTGTGTCCACCGGCTTCTGCCT

barietin -47 CTCTCTTGCTGCTTT-----AGATCTCACCCCATCTCCTCTTCTGAGCAGCTGTGAAGCCAGGAGAAGATAGGCC  
 apiscin -115 CTCTCTTGCTGCTTTAAACCTCACCCACCACCA-----CCCCAGTCTGAAATTTGCCAGCTCAGATCTCACCCCATCTCCTTC-TCTGAGCAGCTGTGAAGCCAGGAGAAGATAGGCC  
 cratrin -120 TTCTCTTGCTGCTTTAAACCTCACCCACCACCACTCCCCAGTCTGAAATTTGCCAGCTCAGATCTCACCCCATCTCCTCTTCTGAGCAGCTGTGAAGCCAGGAGAAGATAGGCC  
 Tf-svVEGF -119 CTCTCTTGCTGCTTTAAATCTCACCCACCACCACCA-----CCCCAGTCTGAAATTTGCCAGCTCAGATCTCACCCCATCTCCTCTTCTGAGCAGCTGTGAAGCCAGGAGAAGATAGGCC  
 Em-VEGF -119 CTCTCTTGCTGCTTTAAATCTCACCCACCACCACCA-----CCCCAGTCTGAAATTTGCCAGCTCAGATCTCACCCCATCTCCTCTTCTGAGCAGCTGTGAAGCCAGGAGAAGATAGGCC  
 Bi-svVEGF -119 CTCTCTTGCTGCTTTAAACCTCACCCACCACCACCA-----CCCCAGTCTGAAATTTGCCAGCTCAGATCTCACCCCATCTCCTCTTCTGAGCAGCTGTGAAGCCAGGAGAAGATAGGCC  
 vammin -71 CTCTCTTGCTGCTTT-----AGATCTCACCCCATCTCCTCTTCTGAGCAGCTGTGAAGCCAGGAGAAGATAGGCC  
 VR-1 -71 CTCTCTTGCTGCTTT-----AGATCTCACCCCATCTCCTCTTCTGAGCAGCTGTGAAGCCAGGAGAAGATAGGCC

Exon I Exon II Exon III  
 barietin 1 ATGCTGCTACCTGCTGGCAGTTGCCATCCTCTTCTGATCCAGGGCTGGCCATCAGGGACAGTGAAGGAAGTGAAGGCCCTTTATGGAAGTGTACACCGCAGCCTCTGCCAGCC  
 apiscin 1 ATGCTGCTACCTGCTGGCAGTTGCCATCCTCTTCTGATCCAGGGCTGGCCATCAGGGACAGTGCAGGGACAAGCGATGCCCTTTATGGAAGTGTACACCGCAGCCTCTGCCAGCC  
 cratrin 1 ATGCTGCTACCTGCTGGCAGTTGCCATCCTCTTCTGATCCAGGGCTGGCCATCAGGGACAGTGCAGGGACAAGCGATGCCCTTTATGGAAGTGTACACCGCAGCCTCTGCCAGCC  
 Tf-svVEGF 1 ATGCTGCTACCTGCTGGCAGTTGCCATCCTCTTCTGATCCAGGGCTGGCCATCAGGGACAGTGCAGGGACAAGTGAAGGCCCTTTATGGAAGTGTACACCGCAGCCTCTGCCAGCC  
 Em-VEGF 1 ATGCTGCTACCTGCTGGCAGTTGCCATCCTCTTCTGATCCAGGGCTGGCCATCAGGGACAGTGCAGGGACAAGTGAAGGCCCTTTATGGAAGTGTACACCGCAGCCTCTGCCAGCC  
 Bi-svVEGF 1 ATGCTGCTACCTGCTGGCAGTTGCCATCCTCTTCTGATCCAGGGCTGGCCATCAGGGACAGTGCAGGGACAAGTGAAGGCCCTTTATGGAAGTGTACACCGCAGCCTCTGCCAGCC  
 vammin 1 ATGCTGCTACCTGCTGGCAGTTGCCATCCTCTTCTGATCCAGGGCTGGCCATCAGGGACAGTGCAGGGACAAGTGAAGGCCCTTTATGGAAGTGTACACCGCAGCCTCTGCCAGCC  
 VR-1 1 ATGCTGCTACCTGCTGGCAGTTGCCATCCTCTTCTGATCCAGGGCTGGCCATCAGGGACAGTGCAGGGACAAGTGAAGGCCCTTTATGGAAGTGTACACCGCAGCCTCTGCCAGCC

..... Signal peptide ..... VHD

barietin 121 AGGGAGACACTCGTGTCCATACTTGAAGAGTACCCCTGATAAAATTTCTAAGATCTTCAGGGCCCTCCCTGTGTGCTGTGTGCGATGCGGTGGCTGTGCTGTACAGAAAGCTTGACGTGC  
 apiscin 121 AGGGAGACACTCGTGTCCATACTTGAAGAGTACCCCTGATAAAATTTCTAAGATCTTCAGGGCCCTCCCTGTGTGCTGTGTGCGATGCGGTGGCTGTGCTGTACAGAAAGCTTGACGTGC  
 cratrin 121 AGGGAGACACTCGTGTCCATACTTGAAGAGTACCCCTGATAAAATTTCTAAGATCTTCAGGGCCCTCCCTGTGTGCTGTGTGCGATGCGGTGGCTGTGCTGTACAGAAAGCTTGACGTGC  
 Tf-svVEGF 121 AGGGAGACACTCGTGTCCATACTTGAAGAGTACCCCTGATAAAATTTCTAAGATCTTCAGGGCCCTCCCTGTGTGCTGTGTGCGATGCGGTGGCTGTGCTGTACAGAAAGCTTGACGTGC  
 Em-VEGF 121 AGGGAGACACTCGTGTCCATACTTGAAGAGTACCCCTGATAAAATTTCTAAGATCTTCAGGGCCCTCCCTGTGTGCTGTGTGCGATGCGGTGGCTGTGCTGTACAGAAAGCTTGACGTGC  
 Bi-svVEGF 121 AGGGAGACACTCGTGTCCATACTTGAAGAGTACCCCTGATAAAATTTCTAAGATCTTCAGGGCCCTCCCTGTGTGCTGTGTGCGATGCGGTGGCTGTGCTGTACAGAAAGCTTGACGTGC  
 vammin 121 AGGGAGACACTCGTGTCCATACTTGAAGAGTACCCCTGATAAAATTTCTAAGATCTTCAGGGCCCTCCCTGTGTGCTGTGTGCGATGCGGTGGCTGTGCTGTACAGAAAGCTTGACGTGC  
 VR-1 121 AGGGAGACACTCGTGTCCATACTTGAAGAGTACCCCTGATAAAATTTCTAAGATCTTCAGGGCCCTCCCTGTGTGCTGTGTGCGATGCGGTGGCTGTGCTGTACAGAAAGCTTGACGTGC

VHD (continued)

Exon IV Exon V  
 barietin 241 ACCCTCTGCGGAAAGCGCTCCGCTCGTCCGGAGATCATCCGGTGGATCCCCAAGGGGACTTCGAAGATAGAGGTGATGCAATTCAGGGACACACAGCTGTGAATCGAGGCCCTCGA  
 apiscin 241 ACCCTCTGCGGAAAGCGCTCCGCTCGTCCGGAGATCATCCGGTGGATCCCCAAGGGGACTTCGAAGATAGAGGTGATGCAATTCAGGGACACACAGCTGTGAATCGAGGCCCTCGA  
 cratrin 241 ACCCTCTGCGGAAAGCGCTCCGCTCGTCCGGAGATCATCCGGTGGATCCCCAAGGGGACTTCGAAGATAGAGGTGATGCAATTCAGGGACACACAGCTGTGAATCGAGGCCCTCGA  
 Tf-svVEGF 241 ACCCTCTGCGGAAAGCGCTCCGCTCGTCCGGAGATCATCCGGTGGATCCCCAAGGGGACTTCGAAGATAGAGGTGATGCAATTCAGGGACACACAGCTGTGAATCGAGGCCCTCGA  
 Em-VEGF 241 ACCCTCTGCGGAAAGCGCTCCGCTCGTCCGGAGATCATCCGGTGGATCCCCAAGGGGACTTCGAAGATAGAGGTGATGCAATTCAGGGACACACAGCTGTGAATCGAGGCCCTCGA  
 Bi-svVEGF 241 ACCCTCTGCGGAAAGCGCTCCGCTCGTCCGGAGATCATCCGGTGGATCCCCAAGGGGACTTCGAAGATAGAGGTGATGCAATTCAGGGACACACAGCTGTGAATCGAGGCCCTCGA  
 vammin 241 ACCCTCTGCGGAAAGCGCTCCGCTCGTCCGGAGATCATCCGGTGGATCCCCAAGGGGACTTCGAAGATAGAGGTGATGCAATTCAGGGACACACAGCTGTGAATCGAGGCCCTCGA  
 VR-1 241 ACCCTCTGCGGAAAGCGCTCCGCTCGTCCGGAGATCATCCGGTGGATCCCCAAGGGGACTTCGAAGATAGAGGTGATGCAATTCAGGGACACACAGCTGTGAATCGAGGCCCTCGA

VHD (continued)

C-terminal tail

Exon VI  
 barietin 361 TCAGCAAGCAGGTTCAACATCGGGAAGCACAAGAA-GAAGCCAGAGGAAGGGGAGT-GAGAGCAAGTTCCCTTTGACT-----CCAGGATCCCTTTGAGCTTCACAG  
 apiscin 361 TCAGCAAGCAGGTTCAACATCGGGAAGCACAAGAGAA-CCCAGAGGAAGGGGAGCCGAGAGCCAAGTTCCCTTTGACTCCGAGCAGCTTTTACTCCGGGAGCCCTTTGAGGCTTCACAG  
 cratrin 361 -----AGCACGTTGAACACCGGGAAGCGCAAGAGAA-CCCAGAGGAAGGGGAGCCGAGAGCCAAGTTCCCTTTGACTTCAGCTCAGCTTTTACTCCGGGAGCCCTTTGAGGCTTCACAG  
 Tf-svVEGF 361 TCAGCAAGCAGGTTGAACACCGGGAAGCACAAGAGAA-CCCAGAGGAAGGGGAGCCGAGAGCCAAGTTCCCTTTGACTTCAGCAGCTTTTACTCCAG-AGCCCTTTGAGGCTTCACAG  
 Em-VEGF 361 TCAGCAAGCAGGTTGAACACCGGGAAGCACAAGAGAA-CCCAGAGGAAGGGGAGCCGAGAGCCAAGTTCCCTTTGACTTCAGCAGCTTTTACTCCAGGAGCCCTTTGAGGCTTCACAG  
 Bi-svVEGF 361 TCAGCAAGCAGGTTGAACACCGGGAAGCACAAGAGAA-CCCAGAGGAAGGGGAGCCGAGAGCCAAGTTCCCTTTGACTTCAGCAGCTTTTACTCCGGGAGCCCTTTGAGGCTTCACAG  
 vammin 361 -----AGCAAGCAGGTTGAACATGACGGAACGGAAGA-GAAGCCAGAGGAAGGGGAGT-GAGAGCAAGTTCCCTTTGACTTCAGCAGCTTTTACTCCAGGAGCCCTTTGAGGCTTCACAG  
 VR-1 361 -----TGCAAGCAGGTTGAACATGAGGGCCGAAAGA-CCCAGAGGAAGGGGAGT-GAGAGCAAGTTCCCTTTGACTTCAGCAGCTTTTACTCCAGGAGCCCTTTGAGGCTTCACAG

C-terminal tail (continued)

barietin 465 CCCACCAGGTTGGGAGGCTCT-GGTCTGCAAGC-AGATGGGGATGGCCCTGGTCCCTGTACTCCTCTTTCTGATGCTGGGGTGGCTGGGAGAGGGAGGCATCTCCAACGTCTGGAG  
 apiscin 480 CCCACCAGGTTGGGAGGCTCTAGGTTGCAAAAGCAGCTGGGAGGCCCCCTGGTCCCTGTTCTCCTTTCTGATGCTGGGGTGGTGGGAAAGGGAGGCATCTCCAACATCTGGAG  
 cratrin 474 CCCACCAGGTTGGGAGGCTCT-GGTCTGCAAAAGCAGCTGGGAGGCCCCCTGGTCCCTGTTCTCCTTTCTGATGCTGGGGTGGTGGGAAAGGGAGGCATCTCCAACATCTGGAG  
 Tf-svVEGF 479 CCCACCAGGTTGGGAGGCTCT-GGTCTGCAAAAGCAGCTGGGAGGCCCCCTGGTCCCTGTTCTCCTTTCTGATGCTGGGGTGGTGGGAAAGGGAGGCATCTCCAACATCTGGAG  
 Em-VEGF 471 CCCACCAGGTTGGGAGGCTCT-GGTCTGCAAAAGCAGCTGGGAGGCCCCCTGGTCCCTGTTCTCCTTTCTGATGCTGGGGTGGTGGGAAAGGGAGGCATCTCCAACATCTGGAG  
 Bi-svVEGF 480 CCCACCAGGTTGGGAGGCTCT-GGTCTGCAAAAGCAGCTGGGAGGCCCCCTGGTCCCTGTTCTCCTTTCTGATGCTGGGGTGGTGGGAAAGGGAGGCATCTCCAACATCTGGAG  
 vammin 477 CCCACCAGGTTGGGAGGCTCT-----AAAGCCAGATGGGAGAGCCCTGGTCCCTGTTCTCCTTTCTGATGCTGGGGTGGTGGGAAAGGGAGGCATCTCCAACATCTGGAG  
 VR-1 474 TCCACCAGGTTGGGAGGCTCT-----AAAGCCAGATGGGAGAGCCCTGGTCCCTGTTCTCCTTTCTGATGCTGGG-ATGGTGGGAAAGGGAGGCATCTCCAACATCTGGAG

Fig. S5.

|           |     |                                                                                                                           |
|-----------|-----|---------------------------------------------------------------------------------------------------------------------------|
| barietin  | 583 | AGGTTGCTTTGTCATCTGTCTACACTTCTACGGCAGCCGGGCGCTG-----AAAACACATC-CTCCAGGCTGCAAGGCCAGAAGCTGAAGAGCGAAG                         |
| apiscin   | 600 | AAGTTGCCATGTATCCATCTACACTTCCATGACAGCCGGGCGCTGGCCCTTCCATGTTTGTGACCTGAAAAACACATCACTCCAGGCTGCAAGGCCAGAAGCTGAAGAGCGAAG        |
| cratrin   | 593 | AAGTTGCTATGTATCCATCTACACTTCTATGACAGCCGGGCGCTGGCCCTTCCATGTTTGTGACCTGAAAAACACATCACTCCAGGCTGCAAGGCCAGAAGCTGAAGAGCGAAG        |
| Tf-svVEGF | 598 | AAGTTGCTATGTATCCATCTACACTTCTATGACAGCCGGGCGCTGGCCCTTCCATGTTTGTGACCTGAAAAACACATCACTCCAGGCTGCAAGGCCAGAAGCTGAAGAGCGAAG        |
| Pm-VEGF   | 590 | AAGTTGCTATGTATCCATCTACACTTCTATGACAGCCGGGCGCTGGCCCTTCCATGTTTGTGACCTGAAAAACACATCACTCCAGGCTGCAAGGCCAGAAGCTGAAGAGCGAAG        |
| Bi-svVEGF | 599 | AAGTTGCTATGTATCCATCTACACTTCTATGACAGCTGGCCCTGGCTTCCATGTTTGTGACCTGAAAAACACATCACTCCAGGCTGCAAGGCCAGAAGCTGAAGAGCGAAG           |
| vammin    | 583 | AGGTTGCTTTGTCATCCATCTAAACTTCTGTGACAGCCGGGCGCTG-----AAAACACATCACTCCAGGCTGCAAG-CCAGAGCTGAAGAGTGAAG                          |
| VR-1      | 579 | AGGTTGCTTTGTCATCCATCTAAACTTCTGTGACAGCCGGGCGCTG-----AAAACACATCACTCCAGGCTGCAAGGCCAGAAGCTGAAGAGCGAAG                         |
|           |     |                                                                                                                           |
| barietin  | 673 | GCAGCTTCCCTTTCCAATAACTCAGCAATCGAGTTTGAATATCTGGCATCTTTTTCTTACATCCGAAAGCCAGGTGCCTCTTGACCAGCTAATTCATCTCCCT----GTTTGCAT       |
| apiscin   | 720 | GCAGCTTCCCTTCCAGTAACCTCAGCAATCGAGTTTGAATTTCTGGCATC-----CGAAAGCC-----TCTTTGACCAGCTAACTC-----CTCA-GAGTTTGCCTT               |
| cratrin   | 713 | GCAGCTTCCCTTCCAGTAACCTCAGCAATCGAGTTTGAATTTCTGGCATC-----TGAAAGCC-----TCTTTGACCAGCTAACTC-----CTCA-GAGTTTGCCTT               |
| Tf-svVEGF | 718 | GCAGCTTCCCTTCCAGTAACCTCAGCAATCGAGTTTGAATTTCTGGCATC-----CGAAAGCC-----TCTTTGACCAGCTAACTCCTCCCTCAAGAGTTTGCCTT                |
| Pm-VEGF   | 710 | GCAGCTTCCCTTCCAGTAACCTCAGCAATCGAGTTTGAATTTCTGGCATC-----CGAAAGCC-----TCTTTGACCAGCTAACTCCTCCCTCAAGAGTTTGCCTT                |
| Bi-svVEGF | 719 | GCAGCTTCCCTTCCAGTAACCTCAGCAATCGAGTTTGAATTTCTGGCATC-----CGAAAGCC-----TCTTTGACCAGCTAACTC-----CTCA-GAGTTTGCCTT               |
| vammin    | 673 | GCATCTCCCTTTACCAATAACTCAGCAATCGAGTTTGAATATCTGGCTTTTTTCTTACATCCGAAAGCCAGGTGCCTCTGACCACTAACTCATCCCT----GTTTGCCTT            |
| VR-1      | 670 | GCAGCTTCCCTTTCCAATAACTCAGCAATCGAGTTTGAATATCTGGCATCTTTTTTCTTACTCCGAAAGCCAGGTGCCTCTGACCACTAACTCATCTCCCTCA---GTCGCTT         |
|           |     |                                                                                                                           |
| barietin  | 788 | TTGTGTCAGCCTTTAATGGCTTTTAGTAAAAATTGCT-----AATACACAATTTTTAAAAATTAAGATTTGATATCTCCGACCCCTCATCAGGGGAGCTGGGGAAAAACATTTGTTTCTT  |
| apiscin   | 812 | TTGTGTCAGT-CTTAATGGCTTTTAGTAAAAATTGCTTTGTAATACACCAATTTTTAAAAATTAAGATTTGATATCTCCGACCCCTCATCAGGGGAGCTGGGGAAAAACATTTAGTTTCTT |
| cratrin   | 805 | TTGTGTCAGC-CTTAATGGCTTTTAGTAAAAATTGCTTTGTAATACACAATTTTTAAAAATTAAGATTTGATATCTCCGACCCCTCATCAGGGGAGCTGGGGAAAAACATTTAGTTTCTT  |
| Tf-svVEGF | 817 | TTGTGTCAGC-CTTAATGGCTTTTAGTAAAAATTGCTTTGTAATACACAATTTTTAAAAATTAAGATTTGATATCTCCGACCCCTCATCAGGGGAGCTGGGGAAAAACATTTAGTTTCTT  |
| Pm-VEGF   | 809 | TTGTGTCAGC-CTTAATGGCTTTTAGTAAAAATTGCTTTGTAATACACAATTTTTAAAAATTAAGATTTGATATCTCCGACCCCTCATCAGGGGAGCTGGGGAAAAACATTTAGTTTCTT  |
| Bi-svVEGF | 811 | TTGTGTCAGC-CTTAATGGCTTTTAGTAAAAATTGCTTTGTAATACACAATTTTTAAAAATTAAGATTTGATATCTCCGACCCCTCATCAGGGGAGCTGGGGAAAAACATTTAGTTTCTT  |
| vammin    | 788 | TTGTGTCAGC-CTTAATGGCTTTTAGTAAAAATTGCTTTGTAATACACAATTTTTAAAAATTAAGATTTGATATCTCCGACCCCTCATCAGGGGAGCTGGGGAAAAACATTTAGTTTCTT  |
| VR-1      | 787 | TTGTGTCAGC-CTTAATGGCTTTTAGTAAAAATTGCTTTGTAATACACAATTTTTAAAAATTAAGATTTGATATCTCCGACCCCTCAACAGGGGAGCTGGGGAAAAACATTTAGTTTCTT  |
|           |     |                                                                                                                           |
| barietin  | 902 | TTAAAGAATGTGAATTTATGCTTTTAGCCCC-ACCTG-----CATGACTTTCAGGAGCCTTGGAAATAAA---CGGAGTAAAT-polyA                                 |
| apiscin   | 931 | TTAAAGAATGTGAATTTATGCTTTTAGCCCCGCTGGATCTGCATGACTTTCACAGAGCCTTGGAAATAAA---CGGAGTAACTAAAAGC-polyA                           |
| cratrin   | 924 | TTAAAGAATGTGAATTTATGCTTTTAGCCCCGCTGGATCTGCATGACTTTCACAGAGCCTTGGAAATAAA---GAGCCTTGGAAATAAA---CGGAGTAAAC-polyA              |
| Tf-svVEGF | 933 | -TTAAAGAATGTGAATTTATGCTTTTAGCCCCGCTGGATCTGCATGACTTTCACAGAGCCTTGGAAATAAA---CGGAGTAACT-polyA                                |
| Pm-VEGF   | 926 | -TTAAAGAATGTGAATTTATGCTTTTAGCCCCGCTGGATCTGCATGACTTTCACAGAGCCTTGGAAATAAA---CGGAGTAACT-polyA                                |
| Bi-svVEGF | 930 | TTAAAGAATGTGAATTTATGCTTTTAGCCCCGCTGGATCTGCATGACTTTCACAGAGCCTTGGAAATAAA---CGGAGTAACT-polyA                                 |
| vammin    | 907 | TTAAAGAATGTGAATTTATGCTTTTAGCCCCATCTG-----CATGACTTTCAGGAGCCTTGGAAATAAA---GGAGTAAAC-polyA                                   |
| VR-1      | 906 | TTAAAGAATGTGAATTTATGCTTTTAGCCCCATCTG-----CATGACTTTCAGGAGCCTTGGAAATAAA---GGAGTAAACT-polyA                                  |

Fig. S5. (continued)
