# Supplementary material
Source: PubMed Central journal article supplement (PMC2665111)
Supplement: M809071200_2.pdf [file M809071200_2.pdf]

**Table S1.** Identity among several tissue- and venom-type VEGFs in amino acid and nucleotide levels

Identities are calculated from nucleotide and amino acid sequences in VHD. Identities in nucleotide and amino acid levels are listed above and below the diagonal line, respectively. Comparisons among tissue- and venom-type VEGFs are colored in blue and pink, respectively.

|                           |                             | Tissue-type VEGF (VEGF-A)   |                             |                            |                            |                            | Venom-type VEGF (VEGF-F) |         |         |                   |         |                     |        |      |       |      |
|---------------------------|-----------------------------|-----------------------------|-----------------------------|----------------------------|----------------------------|----------------------------|--------------------------|---------|---------|-------------------|---------|---------------------|--------|------|-------|------|
|                           |                             | <i>Vaa</i> A <sub>166</sub> | <i>App</i> A <sub>166</sub> | <i>Tf</i> A <sub>166</sub> | <i>Bg</i> A <sub>165</sub> | <i>Hs</i> A <sub>165</sub> | barietin                 | apiscin | cratrin | <i>Tf</i> -svVEGF | Pm-VEGF | <i>Bi</i> -svVEGF** | vammin | VR-1 | HF    | ICPP |
| Tissue-type VEGF (VEGF-A) | <i>Vaa</i> A <sub>166</sub> |                             | 95.3                        | 95.3                       | 97.5                       | 74.3                       | 58.9                     | 58.8    | 59.1    | 59.1              | 58.6    | 58.4                | 62.1   | 59.9 | N.D.* | N.D. |
|                           | <i>App</i> A <sub>166</sub> | 91.5                        |                             | 98.6                       | 94.6                       | 74.3                       | 60.5                     | 57.2    | 57.2    | 57.6              | 57.0    | 57.6                | 59.9   | 58.6 | N.D.  | N.D. |
|                           | <i>Tf</i> A <sub>166</sub>  | 90.4                        | 98.9                        |                            | 94.6                       | 74.6                       | 58.4                     | 57.6    | 57.6    | 57.9              | 57.3    | 57.9                | 59.0   | 59.0 | N.D.  | N.D. |
|                           | <i>Bg</i> A <sub>165</sub>  | 93.6                        | 89.4                        | 88.3                       |                            | 73.6                       | 60.9                     | 58.4    | 58.8    | 58.8              | 58.9    | 58.8                | 61.8   | 59.5 | N.D.  | N.D. |
|                           | <i>Hs</i> A <sub>165</sub>  | 74.5                        | 74.5                        | 73.4                       | 72.3                       |                            | 63.8                     | 63.7    | 64.0    | 64.0              | 63.8    | 64.4                | 65.5   | 65.5 | N.D.  | N.D. |
| Venom-type VEGF (VEGF-F)  | barietin                    | 49.5                        | 50.5                        | 49.5                       | 50.5                       | 52.6                       |                          | 79.1    | 77.3    | 80.2              | 80.3    | 80.6                | 87.4   | 84.2 | N.D.  | N.D. |
|                           | apiscin                     | 47.4                        | 46.3                        | 45.3                       | 45.3                       | 49.5                       | 68.4                     |         | 92.1    | 92.8              | 92.4    | 92.5                | 82.4   | 81.7 | N.D.  | N.D. |
|                           | cratrin                     | 48.4                        | 47.4                        | 46.3                       | 45.3                       | 47.4                       | 64.2                     | 84.2    |         | 90.0              | 91.7    | 91.4                | 81.0   | 80.3 | N.D.  | N.D. |
|                           | <i>Tf</i> -svVEGF           | 50.5                        | 49.5                        | 48.4                       | 48.4                       | 52.6                       | 66.3                     | 85.3    | 82.1    |                   | 96.4    | 92.5                | 83.5   | 81.7 | N.D.  | N.D. |
|                           | Pm-VEGF                     | 49.5                        | 48.4                        | 47.4                       | 49.5                       | 51.6                       | 68.4                     | 84.2    | 83.3    | 92.6              |         | 91.7                | 82.7   | 80.9 | N.D.  | N.D. |
|                           | <i>Bi</i> -svVEGF           | 47.4                        | 48.4                        | 47.4                       | 46.3                       | 50.5                       | 66.3                     | 85.3    | 84.4    | 83.2              | 80.0    |                     | 82.8   | 81.4 | N.D.  | N.D. |
|                           | vammin                      | 52.6                        | 49.5                        | 48.4                       | 50.5                       | 50.5                       | 73.7                     | 66.3    | 66.3    | 71.6              | 65.3    | 68.4                |        | 93.5 | N.D.  | N.D. |
|                           | VR-1                        | 49.5                        | 46.3                        | 45.3                       | 47.4                       | 49.5                       | 69.5                     | 65.3    | 63.5    | 67.4              | 61.1    | 67.4                | 88.4   |      | N.D.  | N.D. |
|                           | HF                          | 52.6                        | 49.5                        | 48.4                       | 50.5                       | 50.5                       | 74.7                     | 67.4    | 67.7    | 70.5              | 64.2    | 69.5                | 98.9   | 89.5 |       | N.D. |
|                           | ICPP                        | 52.6                        | 50.5                        | 49.5                       | 50.5                       | 54.7                       | 74.7                     | 67.4    | 66.7    | 70.5              | 64.2    | 69.5                | 93.7   | 89.5 | 94.7  |      |

\*When cDNA cloning of HF and ICPP was not performed, sections are labeled as N.D. (not determined).

\*\**Bi*-svVEGF from the venom of *Bothrops insralis*.

**Table SIIA.** Nucleotide length of exons and introns of the genes encoding *Tf* VEGF-A (tissue-type) and *Tf*-svVEGF (venom-type).

| Exons             |          |    |     |    |    |          |     |          | (bp)  |
|-------------------|----------|----|-----|----|----|----------|-----|----------|-------|
| Exon              | 1 (ORF*) | 2  | 3   | 4  | 5  | 6 (ORF)  | 7   | 8 (ORF)  | total |
| <i>Tf</i> VEGF-A  | 190 (66) | 52 | 197 | 77 | 33 | 72       | 132 | 573 (19) | 1,326 |
| <i>Tf</i> -svVEGF | 242 (45) | 31 | 197 | 80 | 42 | 618 (43) |     |          | 1,210 |

\* Exon-1, exon-6 encoding VEGF-F, and exon-8 encoding VEGF-A are composed of UTR and ORF.

Nucleotide numbers of ORF in exon-1, exon-6 and exon-8 are in parentheses.

| Introns           |       |       |       |       |       |       |       |        | (bp) |
|-------------------|-------|-------|-------|-------|-------|-------|-------|--------|------|
| Intron            | 1     | 2     | 3     | 4     | 5     | 6     | 7     | total  |      |
| <i>Tf</i> VEGF-A  | 6,071 | 6,626 | 1,860 | 1,295 | 2,956 | 1,130 | 1,941 | 21,879 |      |
| <i>Tf</i> -svVEGF | 735   | 413   | 138   | 471   | 170   |       |       | 1,927  |      |

**Table SII B.** Identities between *Tf* VEGF-A (tissue-type) and *Tf*-svVEGF (venom-type).

| Exons (ORF)    |       |       |         |       |       |       |
|----------------|-------|-------|---------|-------|-------|-------|
| Exon           | 1     | 2     | 3       | 4     | 5     | 6     |
| Nucleotide (%) | 48.6  | 45.2  | 58.4    | 58.4  | 48.3  | 47.5  |
| ratio (bp)     | 17/35 | 15/31 | 115/197 | 45/77 | 14/29 | 19/40 |
| Amino acid (%) | 22.2  | 20.0  | 53.0    | 33.3  | 0     | 0     |
| ratio (AA)     | 2/9   | 2/10  | 35/66   | 9/27  | –     | –     |

–, non-homologous sequences

| Introns        |         |         |        |        |        |
|----------------|---------|---------|--------|--------|--------|
| Intron         | 1       | 2       | 3      | 4      | 5      |
| Nucleotide (%) | 43.5    | 45.8    | 43.3   | 45.5   | 44.1   |
| ratio (bp)     | 327/751 | 192/419 | 61/141 | 70/154 | 78/177 |

**Table SIII A.** Heparin-binding ability of VEGFs

|                                 | NaCl (M) (n=4) |
|---------------------------------|----------------|
| <i>Hs</i> VEGF-A <sub>165</sub> | 0.72 ± 0.007   |
| barietin                        | 0.60 ± 0.002   |
| vammin                          | 0.38 ± 0.002   |

**Table SIII B.** Kinetic parameters for binding of barietin to immobilized VEGF receptors

|                                 | $k_{ass}$<br>$s^{-1} (\times 10^4)$ | $k_{diss}$<br>$M^{-1} s^{-1} (\times 10^6)$ | $K_d$<br>$M (\times 10^{-9})$ |
|---------------------------------|-------------------------------------|---------------------------------------------|-------------------------------|
| <b>Flt-1 (R1)</b>               |                                     |                                             |                               |
| <i>Hs</i> VEGF-A <sub>165</sub> | 4.29                                | 0.46                                        | 0.011                         |
| barietin                        | 2.51                                | 0.83                                        | 3.31                          |
| vammin                          | –                                   | –                                           | –                             |
| <b>KDR (R2)</b>                 |                                     |                                             |                               |
| <i>Hs</i> VEGF-A <sub>165</sub> | 4.24                                | 11.0                                        | 0.26                          |
| barietin                        | 6.58                                | 0.26                                        | 0.40                          |
| vammin                          | 1.12                                | 4.60                                        | 0.41                          |
| <b>Flt-4 (R3)</b>               |                                     |                                             |                               |
| <i>Hs</i> VEGF-C                | 0.000017                            | 1220.0                                      | 7.23                          |
| barietin                        | –                                   | –                                           | –                             |
| vammin                          | –                                   | –                                           | –                             |
| <b>NP-1</b>                     |                                     |                                             |                               |
| <i>Hs</i> VEGF-A <sub>165</sub> | 0.66                                | 95.6                                        | 14.4                          |
| barietin                        | –                                   | –                                           | –                             |
| vammin                          | –                                   | –                                           | –                             |

–, no specific binding ability

**Table SIV.**  $K_A/K_S$  values for pairs of tissue- and venom-type VEGFs

The  $K_A$  and  $K_S$  values for the C-terminal tail-coding region of venom-type VEGFs (exons V and VI) were not calculated due to the number of framing errors.

| Pair of VEGF cDNAs |                   |                   | Signal peptide coding region |        |           | VHD coding region |       |           |
|--------------------|-------------------|-------------------|------------------------------|--------|-----------|-------------------|-------|-----------|
|                    |                   |                   | $K_A$                        | $K_S$  | $K_A/K_S$ | $K_A$             | $K_S$ | $K_A/K_S$ |
| <i>Tissue-type</i> | <i>Vaa</i> VEGF-A | <i>App</i> VEGF-A | 0.0167                       | 0      | 0         | 0.037             | 0.091 | 0.404     |
|                    | <i>Vaa</i> VEGF-A | <i>Tf</i> VEGF-A  | 0.0167                       | 0      | 0         | 0.041             | 0.072 | 0.577     |
|                    | <i>App</i> VEGF-A | <i>Tf</i> VEGF-A  | 0                            | 0      | 0         | 0.005             | 0.053 | 0.085     |
| <i>Venom-type</i>  | vammin            | apiscin           | 0                            | 0.0531 | 0         | 0.184             | 0.234 | 0.788     |
|                    | vammin            | <i>Tfsv</i> VEGF  | 0                            | 0      | 0         | 0.163             | 0.250 | 0.653     |
|                    | apiscin           | <i>Tfsv</i> VEGF  | 0                            | 0.0531 | 0         | 0.066             | 0.099 | 0.672     |
